# Supplementary material for: K3PO4-promoted domino reactions: diastereoselective synthesis of trans-2,3-dihydrobenzofurans from salicyl N-tert-butanesulfinyl imines and sulfur ylides
Source: Royal Society of Chemistry journal article supplement (doi:10.1039/c9ra00309f), 2019-01-01
Supplement: c9ra00309f1.pdf [file c9ra00309f1.pdf]

## Supporting Information

### **K<sub>3</sub>PO<sub>4</sub>-Promoted Domino Reactions: Distereoselective Synthesis of *trans*-2,3-Dihydrobenzofurans from Salicyl *N*-*tert*-Butanesulfinyl imines and Sulfur Ylides**

Minxuan Zhang,<sup>a</sup> Tianyu Lu,<sup>a</sup> Yun Zhao,<sup>a</sup> Guixian Xie,<sup>\*c</sup> and Zhiwei Miao<sup>\*a,b</sup>

<sup>a</sup> State Key Laboratory and Institute of Elemento-Organic Chemistry, College of Chemistry, Nankai University, Tianjin 300071, People's Republic of China.

<sup>b</sup> Collaborative Innovation Center of Chemical Science and Engineering, Nankai University, Tianjin 300071, People's Republic of China.

<sup>c</sup> College of Resources and Environment, Hunan Agricultural University, Changsha 410128, People's Republic of China.

Fax: +86-22-23502351; Tel: +86-22-23504783

E-mail: [miaozhiwei@nankai.edu.cn](mailto:miaozhiwei@nankai.edu.cn)

#### **Table of Contents**

|                                                                                                                                         |     |
|-----------------------------------------------------------------------------------------------------------------------------------------|-----|
| Copies of <sup>1</sup> H NMR and <sup>13</sup> C NMR spectra of <i>trans</i> -( <i>Ss</i> , <i>2R</i> , <i>3R</i> )- <b>3a-3l</b> ..... | S2  |
| Copies of <sup>1</sup> H NMR and <sup>13</sup> C NMR spectra of <i>trans</i> -( <i>Rs</i> , <i>2S</i> , <i>3S</i> )- <b>3a-3n</b> ..... | S14 |
| Copies of <sup>1</sup> H NMR and <sup>13</sup> C NMR spectra of <i>cis</i> -( <i>Ss</i> , <i>2R</i> , <i>3R</i> )- <b>3a</b> .....      | S26 |
| Copy of <sup>1</sup> H NMR and <sup>13</sup> C NMR spectra of <b>4a</b> .....                                                           | S27 |
| X-ray crystallographic data of compound <i>trans</i> - <b>3a</b> .....                                                                  | S28 |
| X-ray crystallographic data of compound <i>trans</i> - <b>3d</b> .....                                                                  | S30 |

Copies of  $^1\text{H}$  NMR and  $^{13}\text{C}$  NMR spectra of (*Ss,2R,3R*)-*trans*-3a-3l:

*Trans*-(*S*)-*N*-((2*R,3R*)-2-Benzoyl-2,3-dihydrobenzofuran-3-yl)-2-methylpropane-2-sulfonamide

(3a).

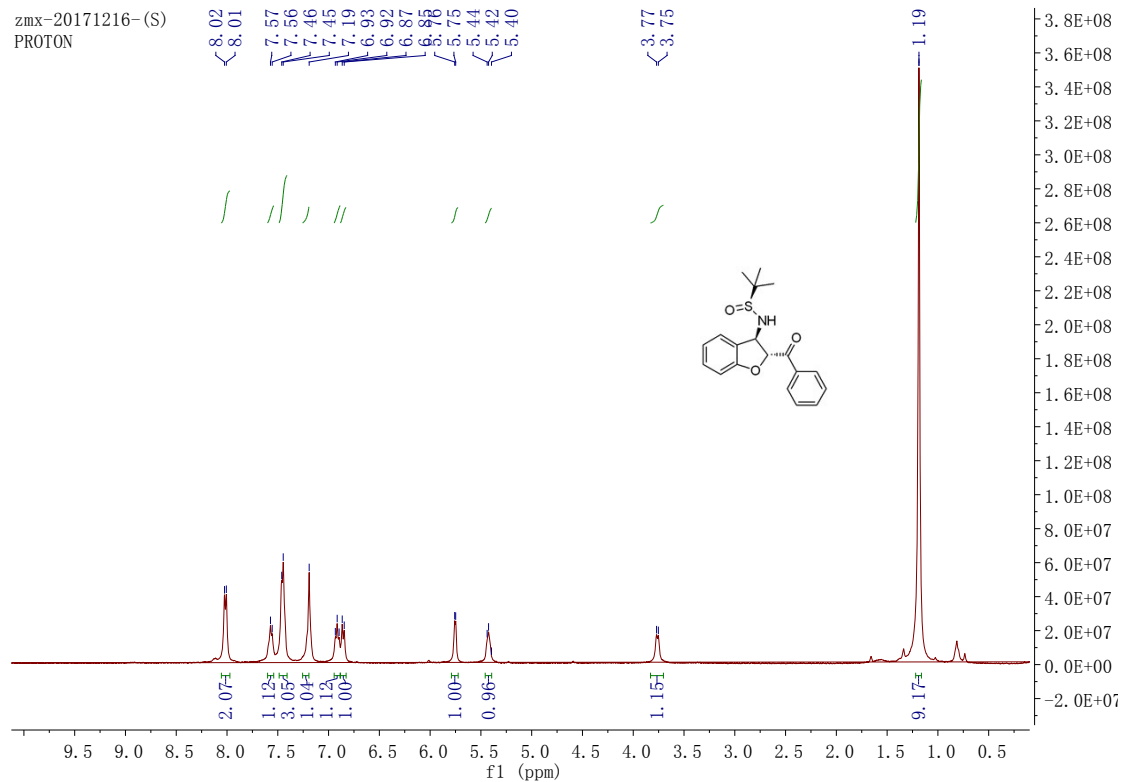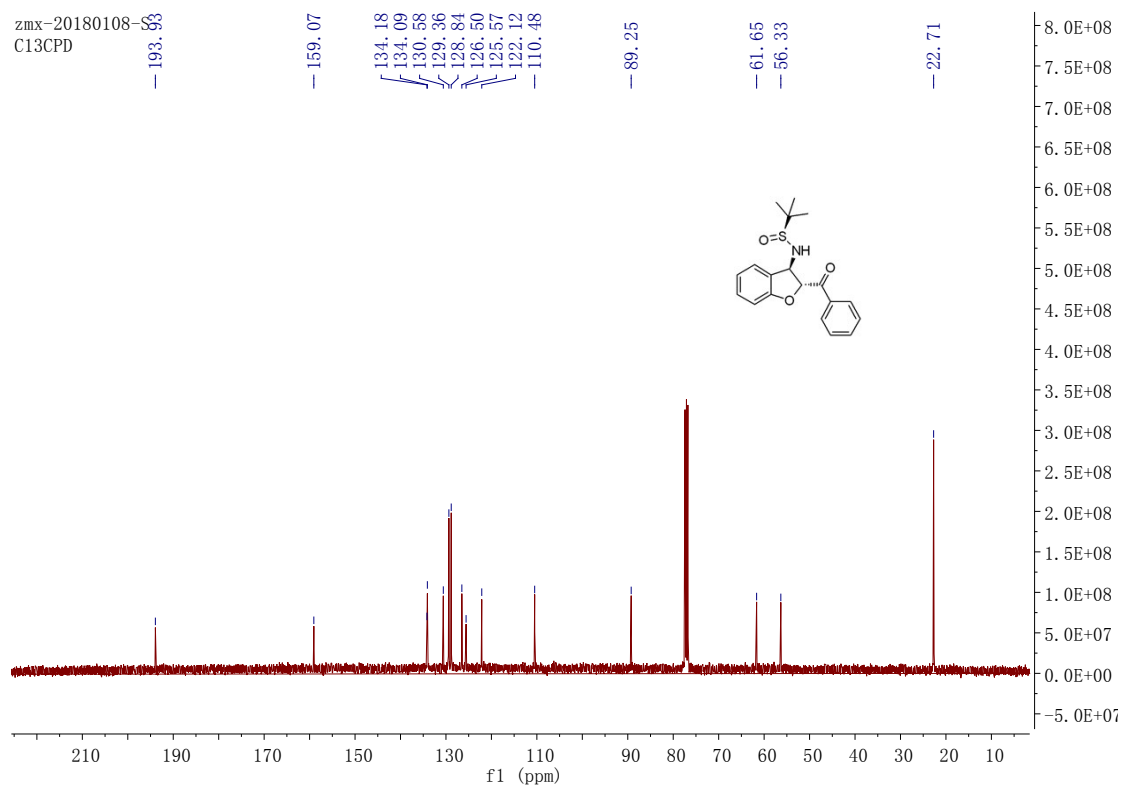

***Trans-(S)-N-((2R,3R)-2-benzoyl-5-chloro-2,3-dihydrobenzofuran-3-yl)-2-methylpropane-2-sulfinamide (3b)***

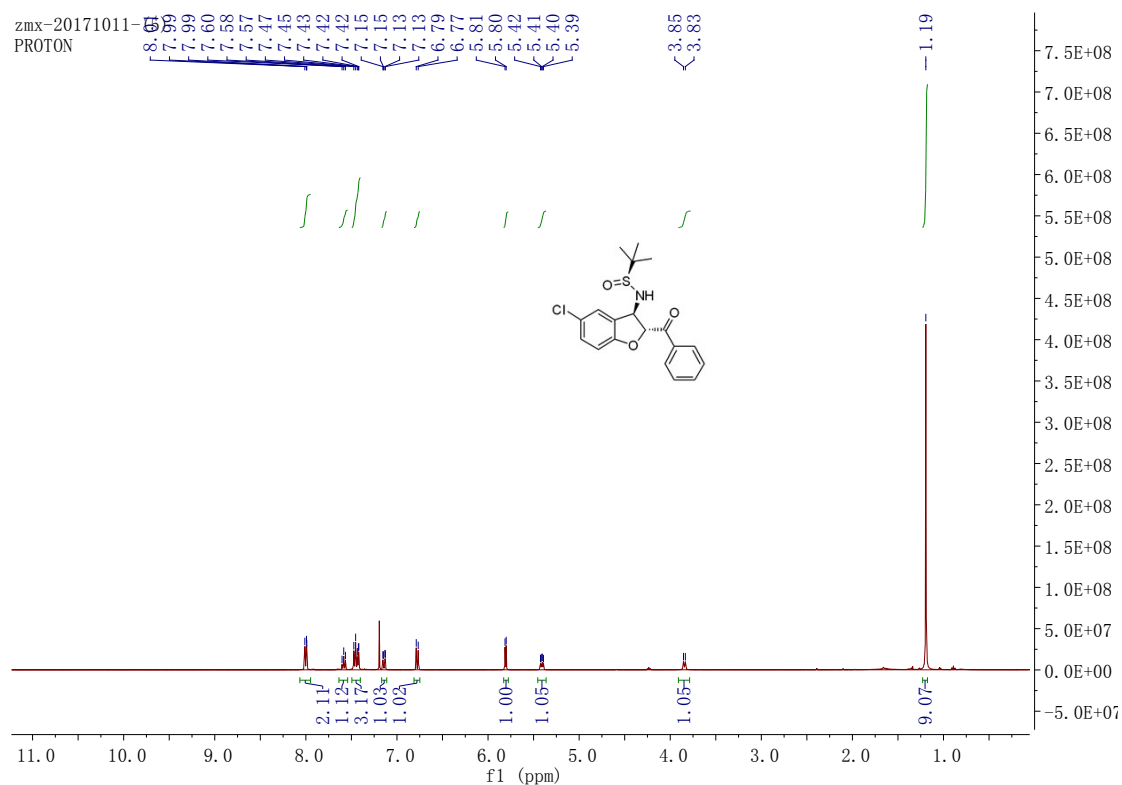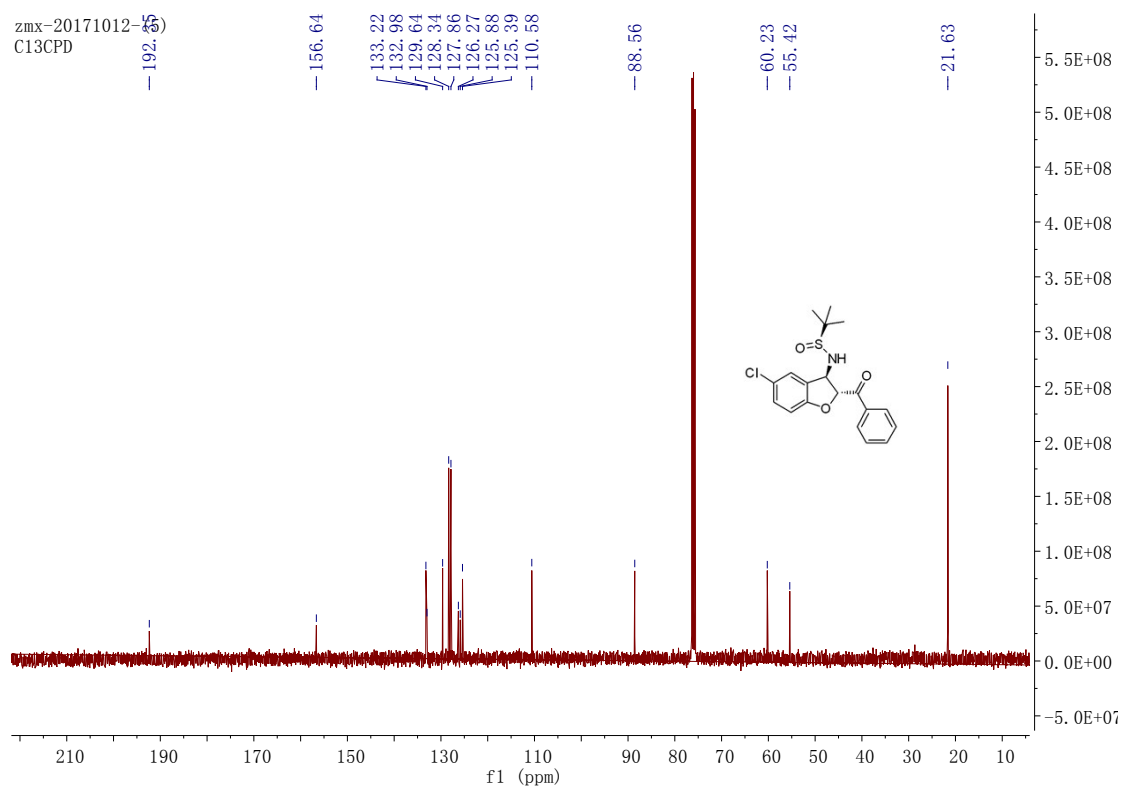

***Trans-(S)-N-((2R,3R)-2-Benzoyl-5-bromo-2,3-dihydrobenzofuran-3-yl)-2-methylpropane-2-sulfinamide (3c)***

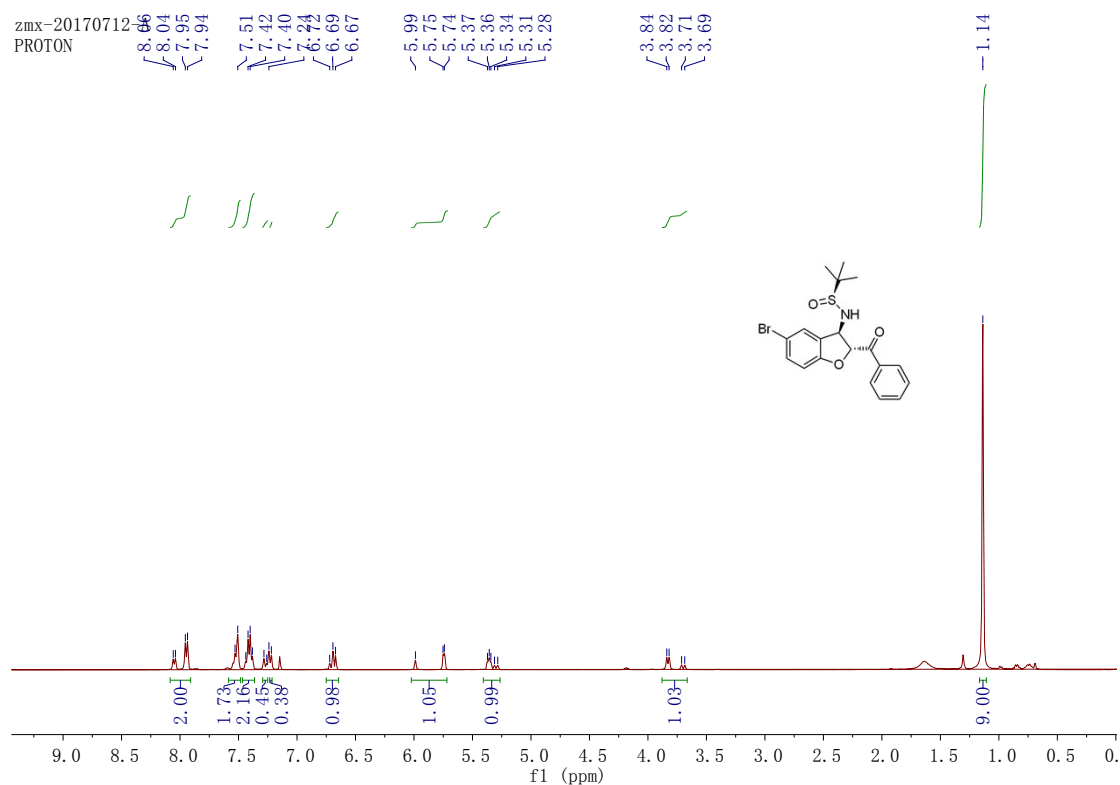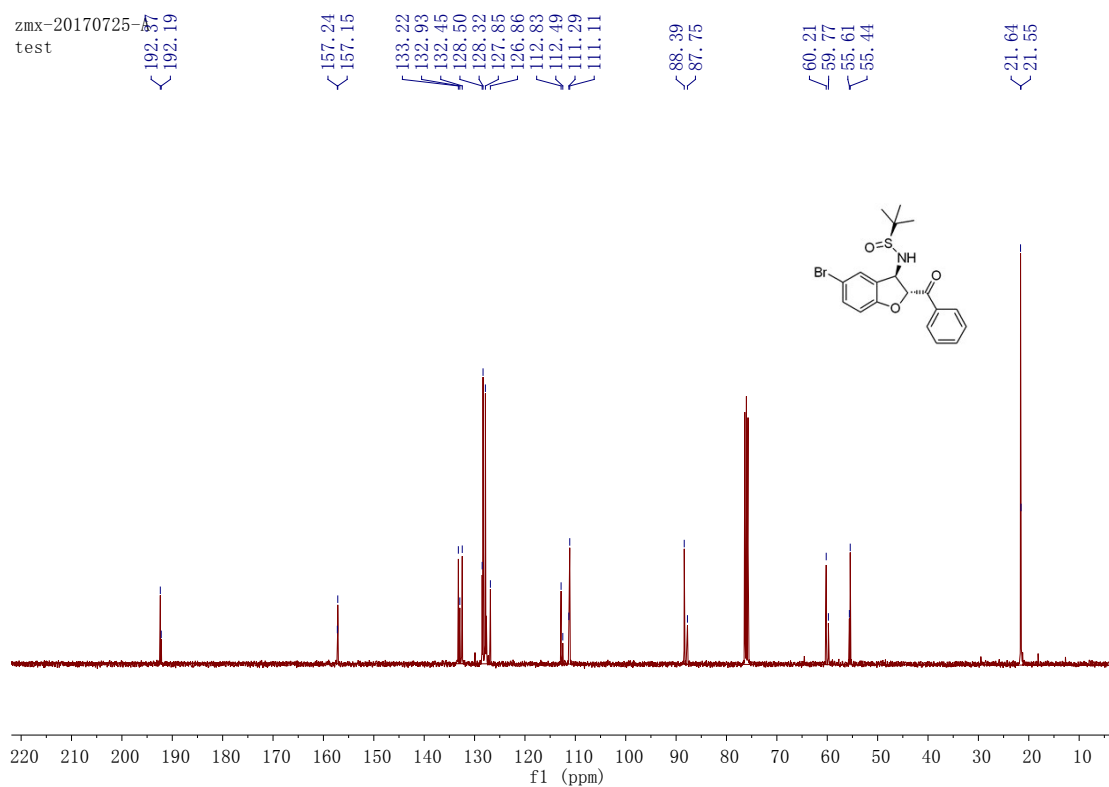

***Trans-(S)-N-((2R,3R)-2-Benzoyl-5,7-dichloro-2,3-dihydrobenzofuran-3-yl)-2-methylpropane-2-sulfinamide (3d)***

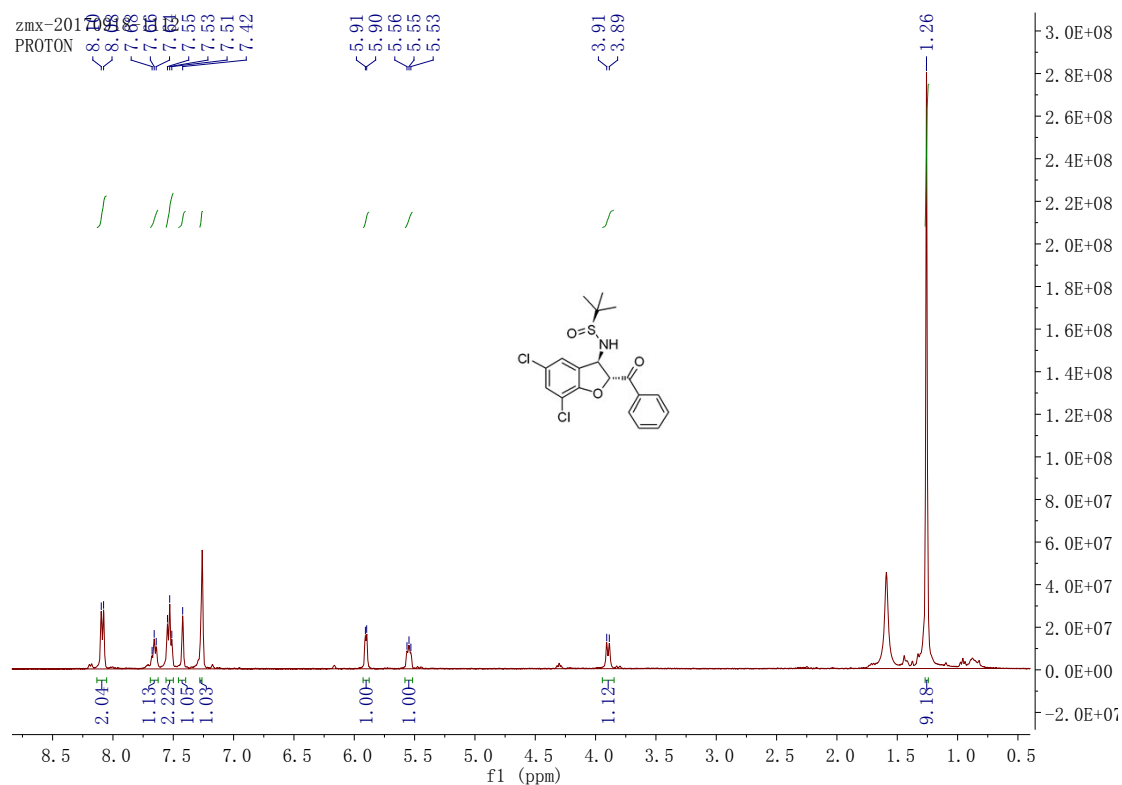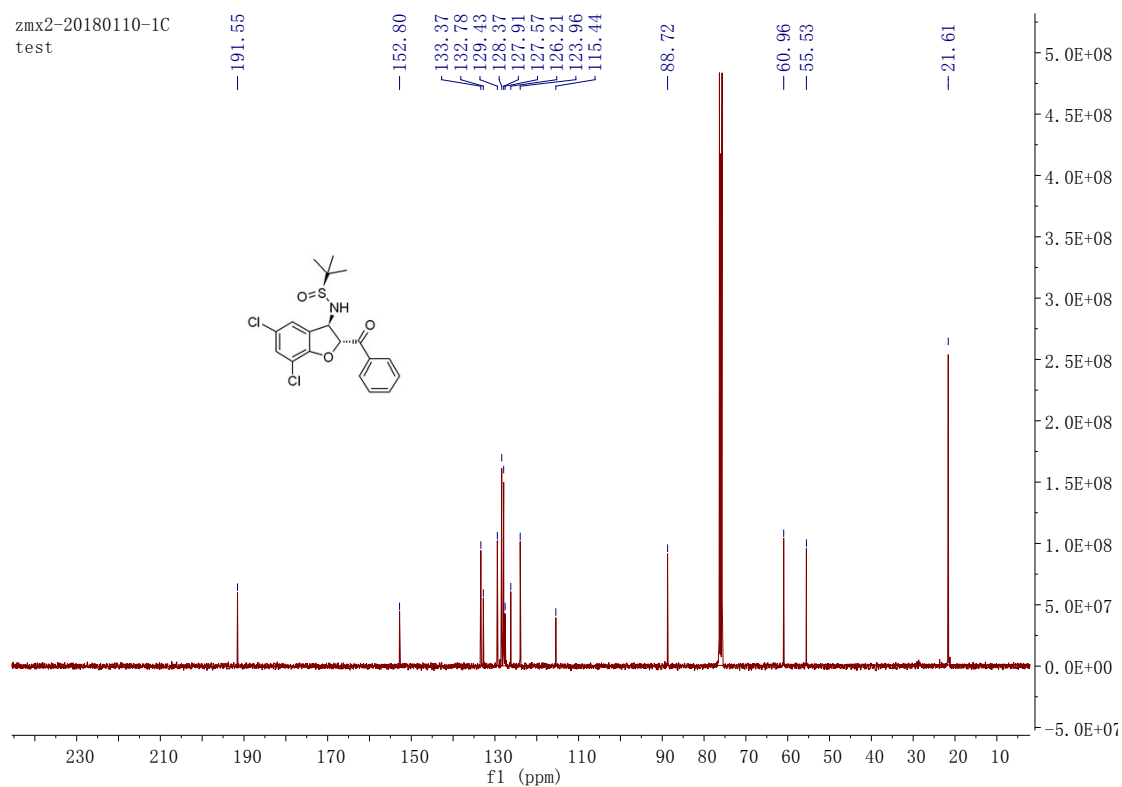

***Trans-(S)-N-((1R,2R)-2-Benzoyl-1,2-dihydronaphtho[2,1-b]furan-1-yl)-2-methylpropane-2-sulfinamide (3e)***

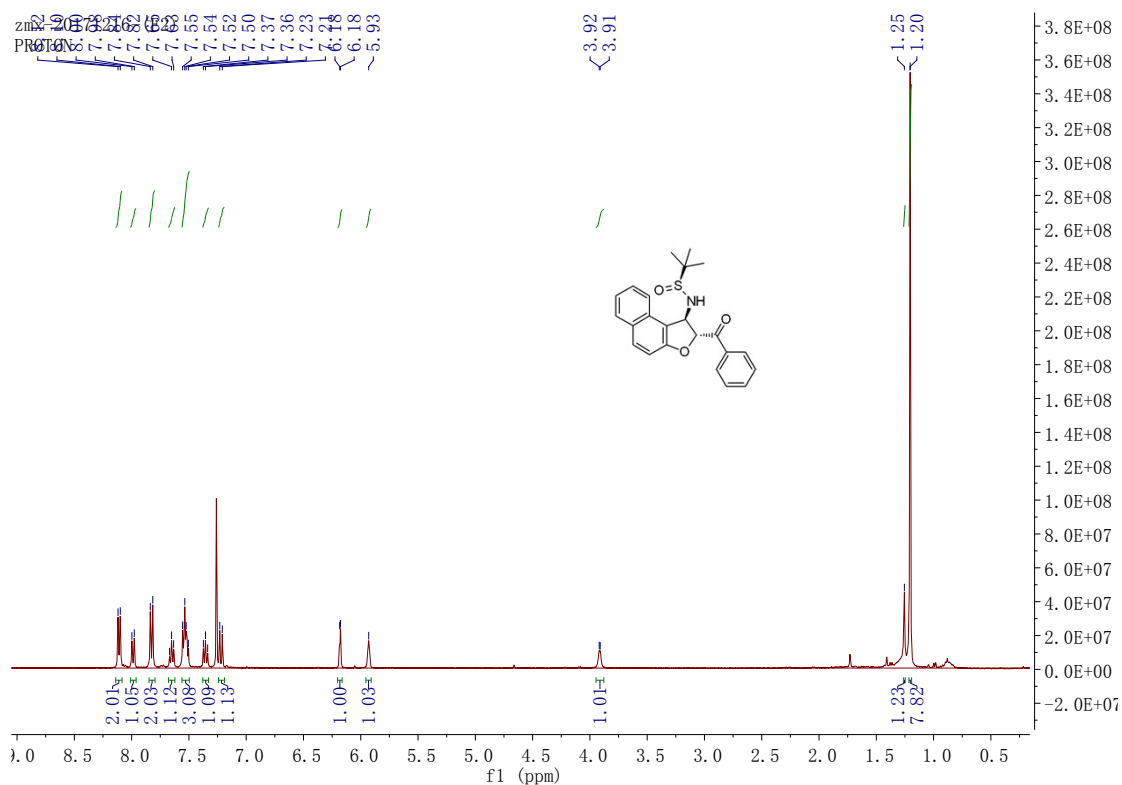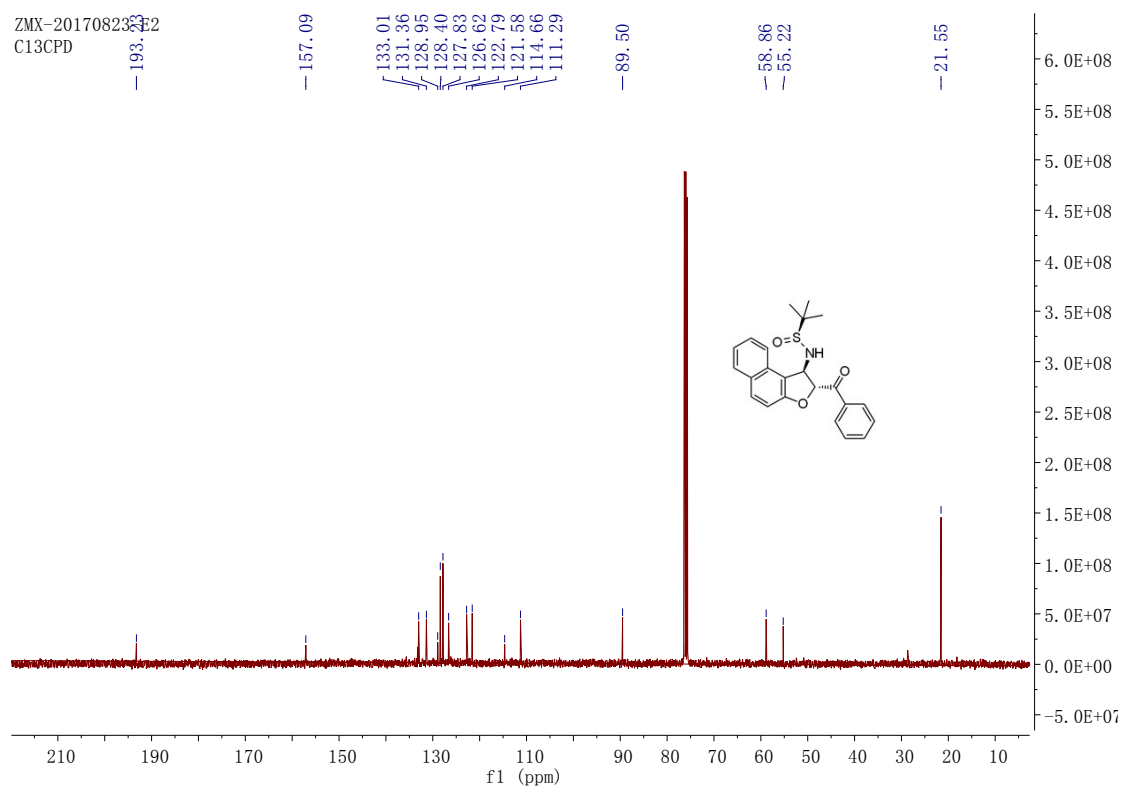

***Trans-(S)-N-((2R,3R)-5-Chloro-2-(4-chlorobenzoyl)-2,3-dihydrobenzofuran-3-yl)-2-methylpropane-2-sulfinamide (3f)***

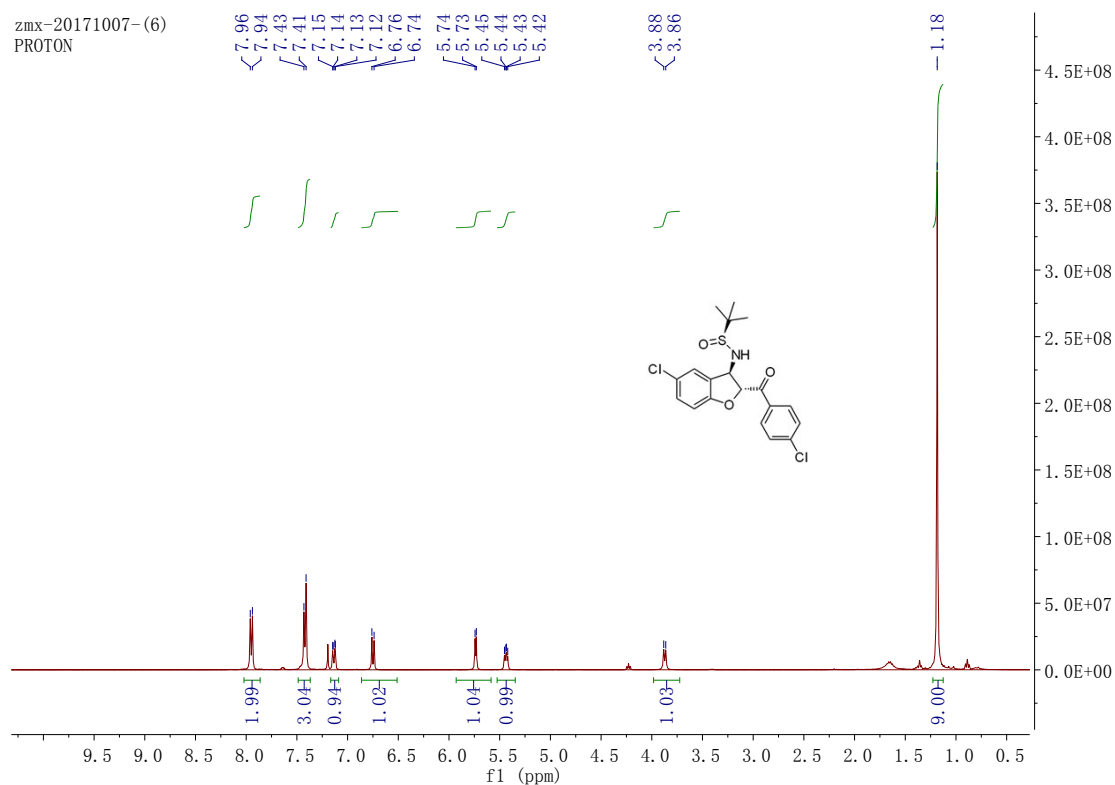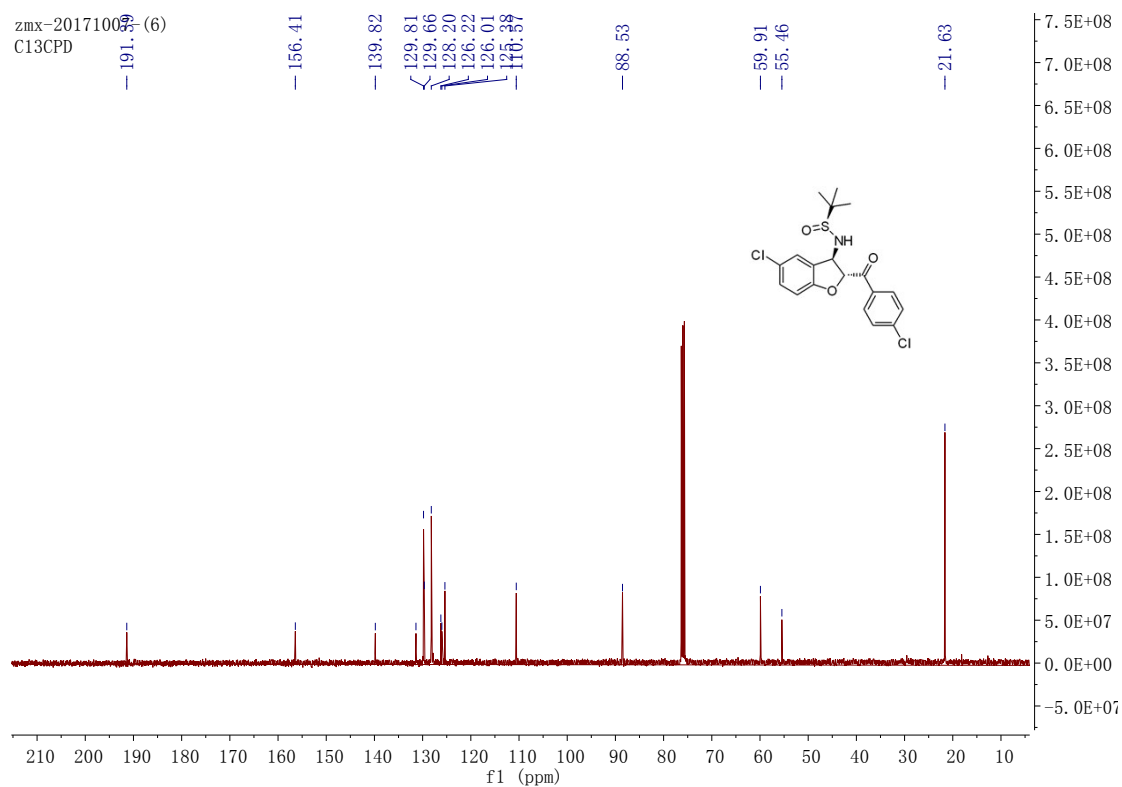

***Trans-(S)-N-((2R,3R)-5-Bromo-2-(4-chlorobenzoyl)-2,3-dihydrobenzofuran-3-yl)-2-methylpropane-2-sulfinamide (3g)***

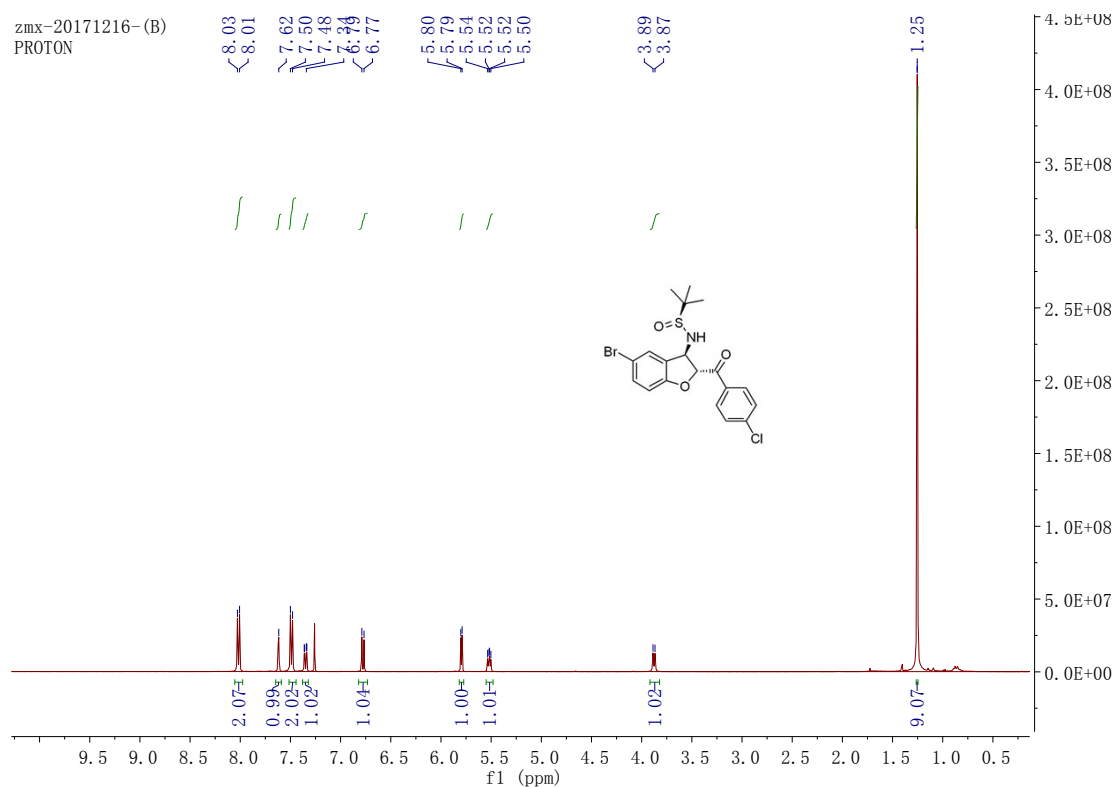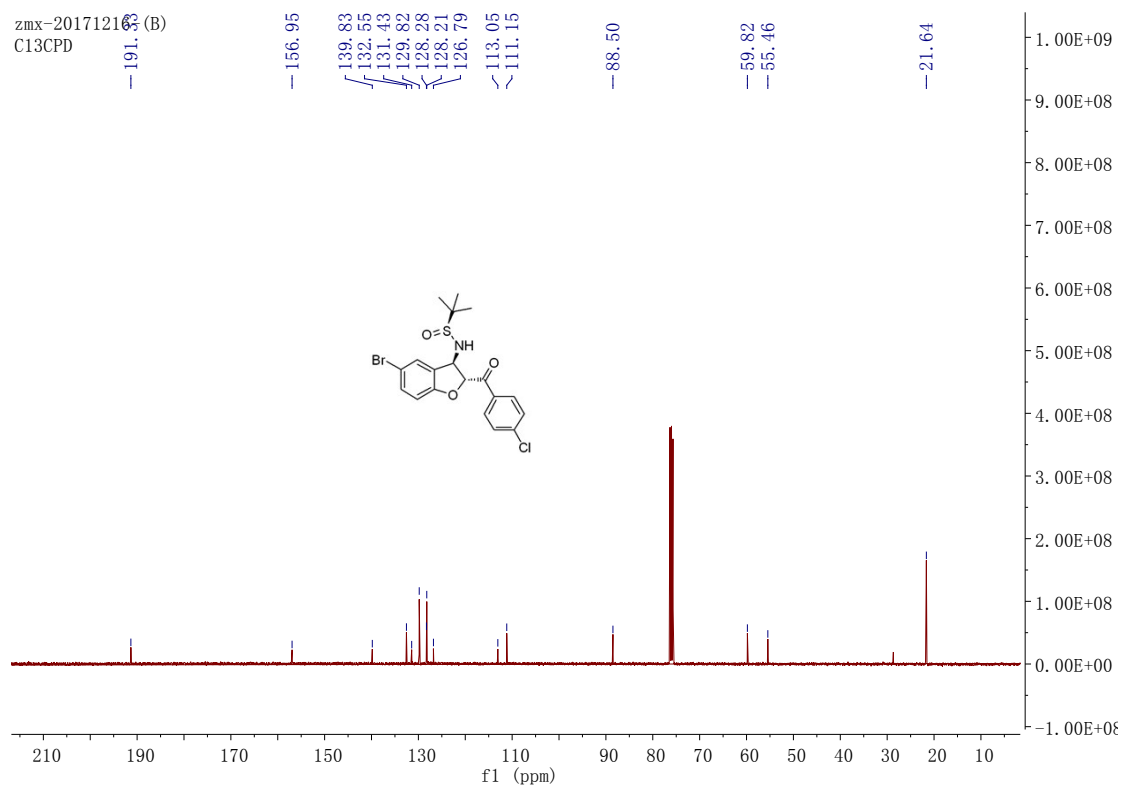



***Trans-(S)-N-((2R,3R)-5,7-dichloro-2-(4-chlorobenzoyl)-2,3-dihydrobenzofuran-3-yl)-2-methylpropane-2-sulfinamide (3h)***

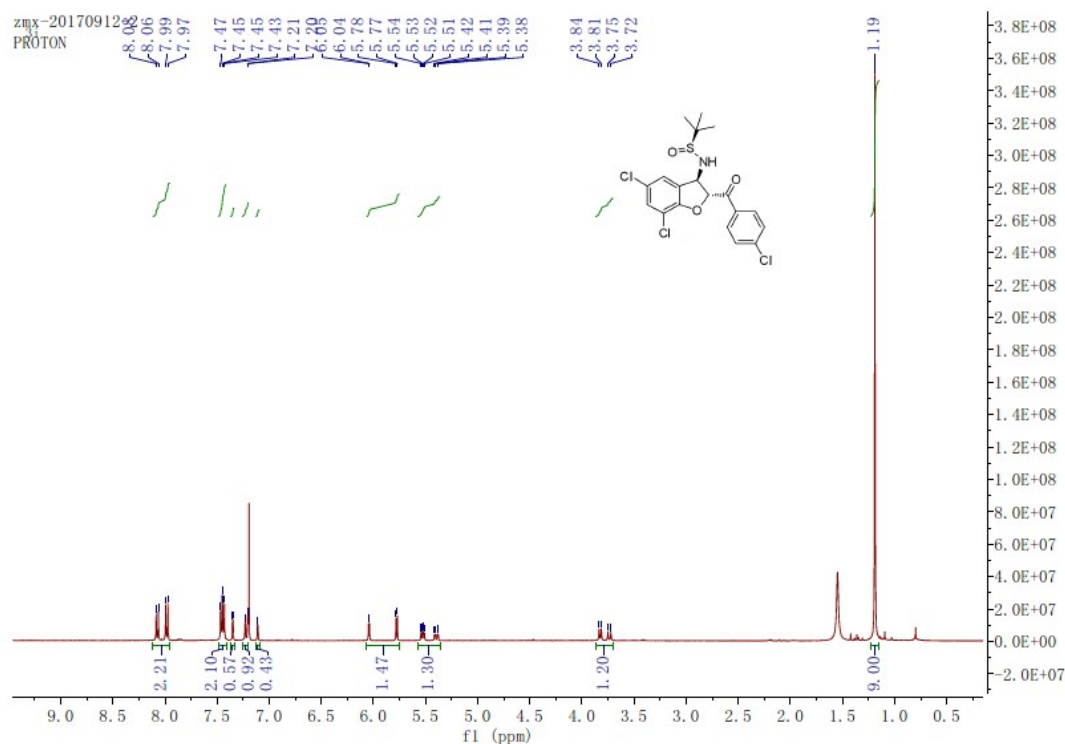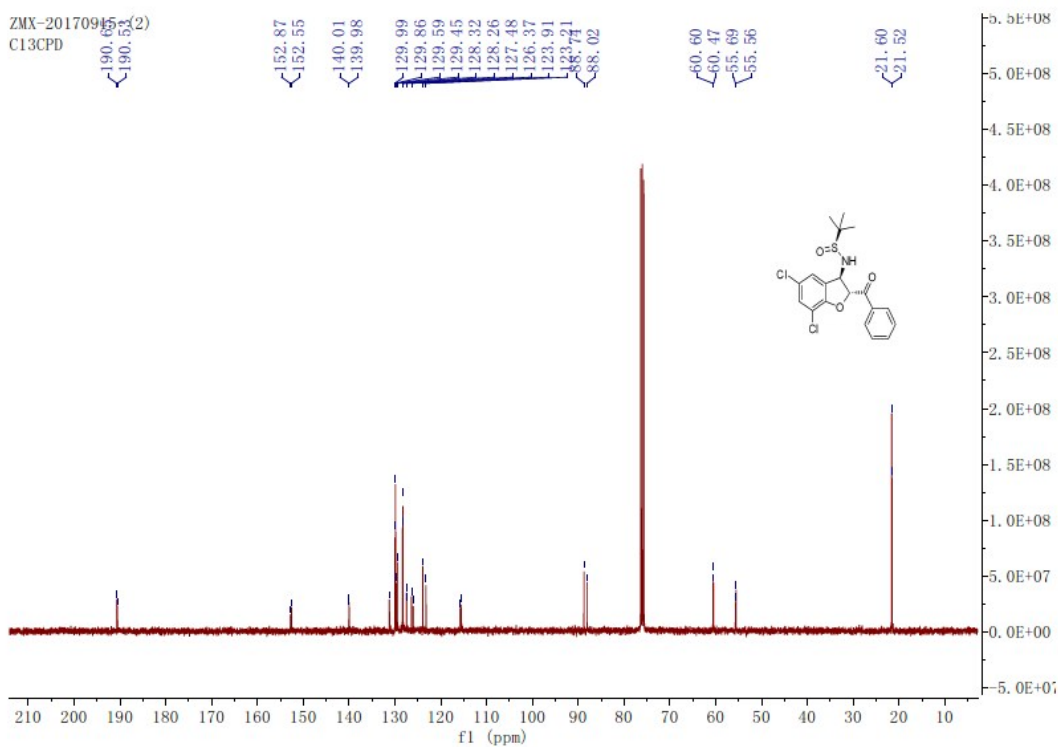

***Trans-(S)-N-((1R,2R)-2-(4-Chlorobenzoyl)-1,2-dihydronaphtho[2,1-b]furan-1-yl)-2-methylpropane-2-sulfinamide (3i)***

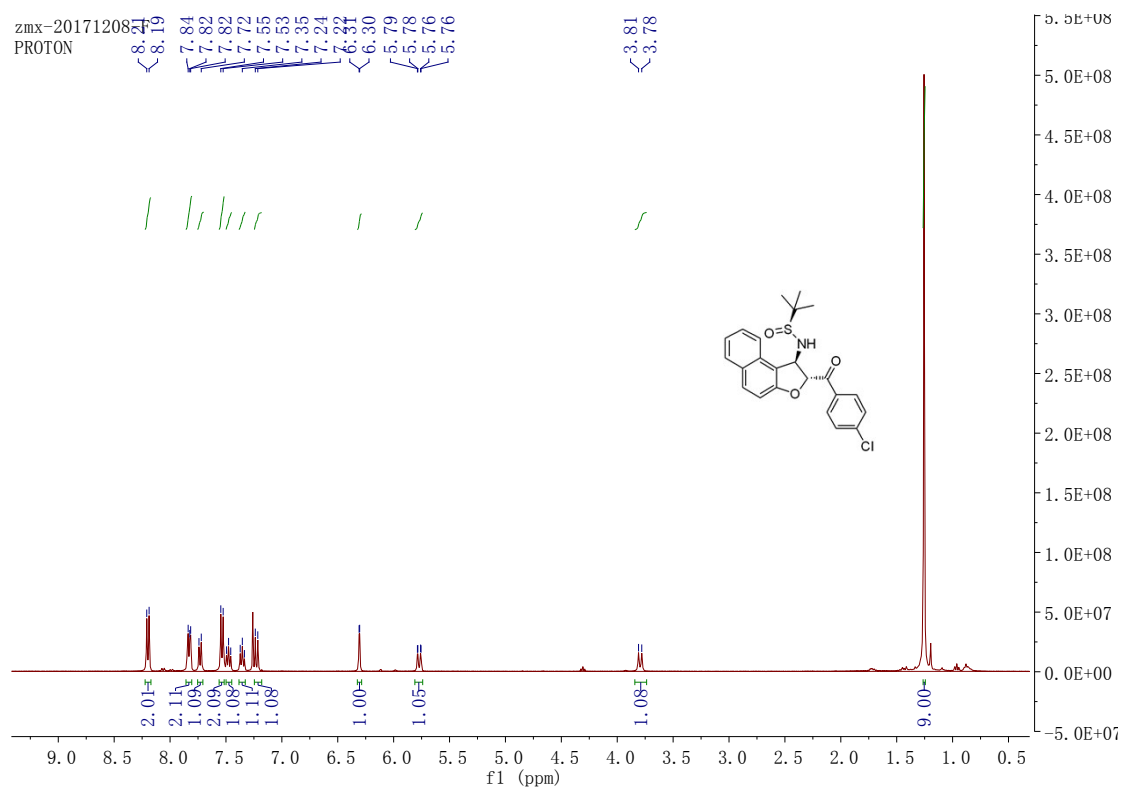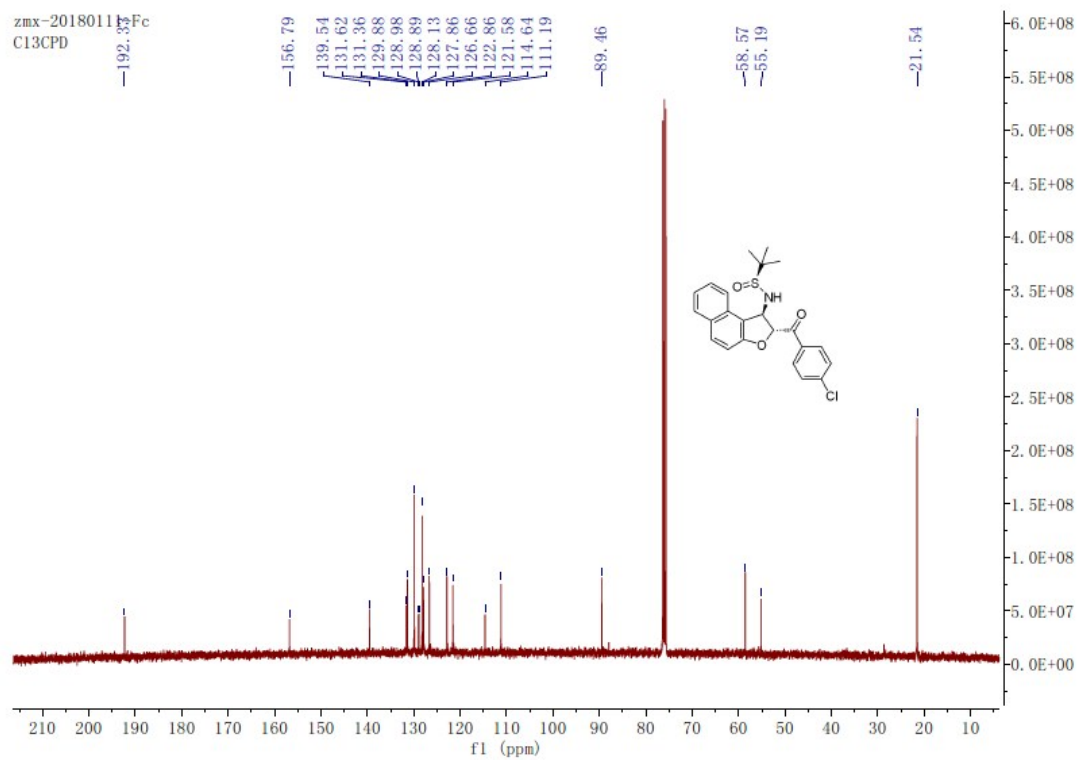

***Trans-(S)-2-Methyl-N-((1R,2R)-2-(4-methylbenzoyl)-1,2-dihydronaphtho[2,1-b]furan-1-yl)propane-2-sulfinamide (3j)***

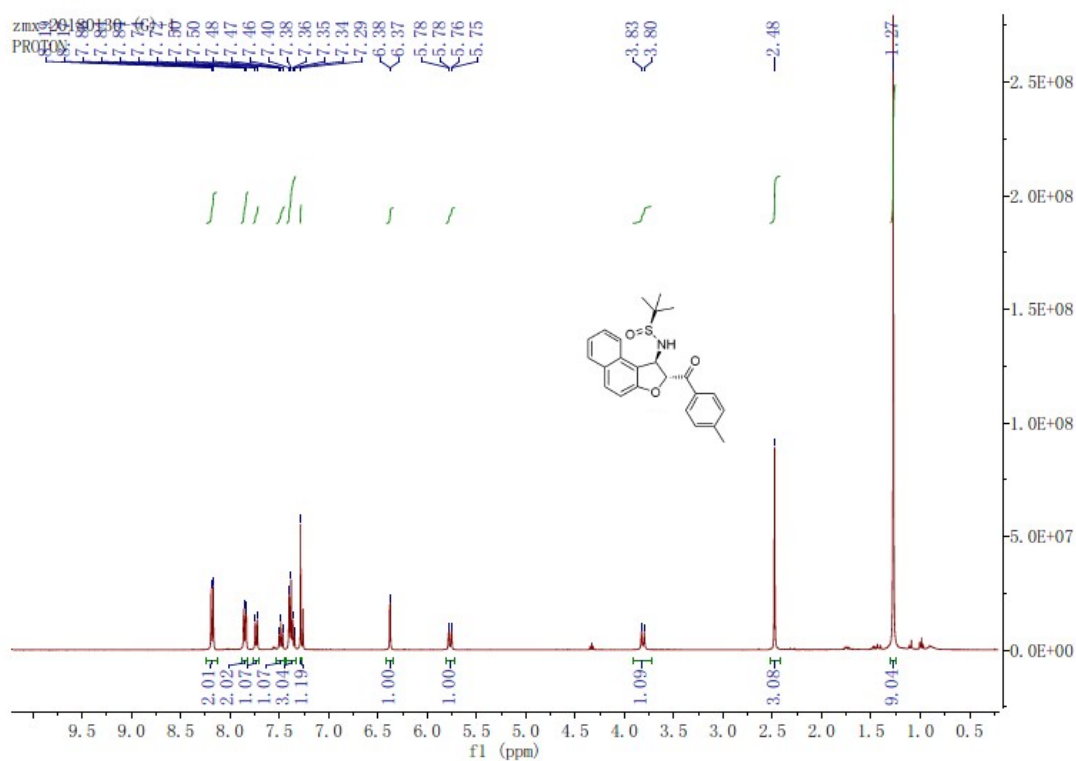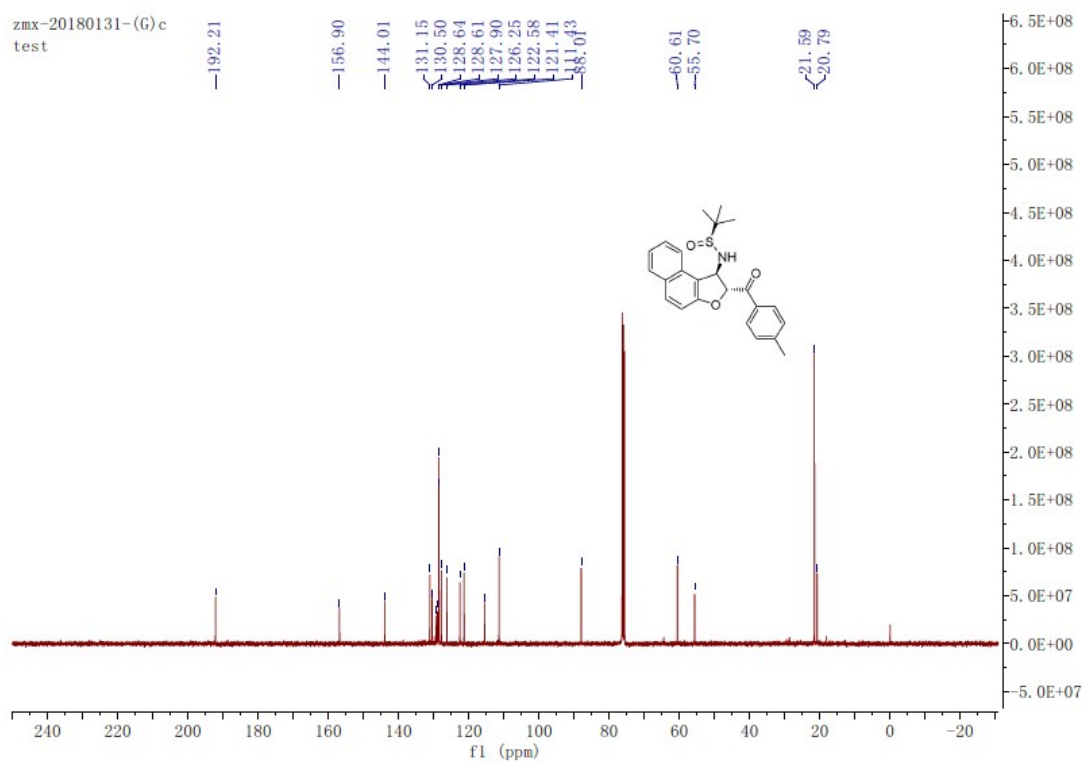

***Trans-(S)-N-((2R,3R)-5-Bromo-2-(4-methylbenzoyl)-2,3-dihydrobenzofuran-3-yl)-2-methylpropane-2-sulfinamide (3k)***

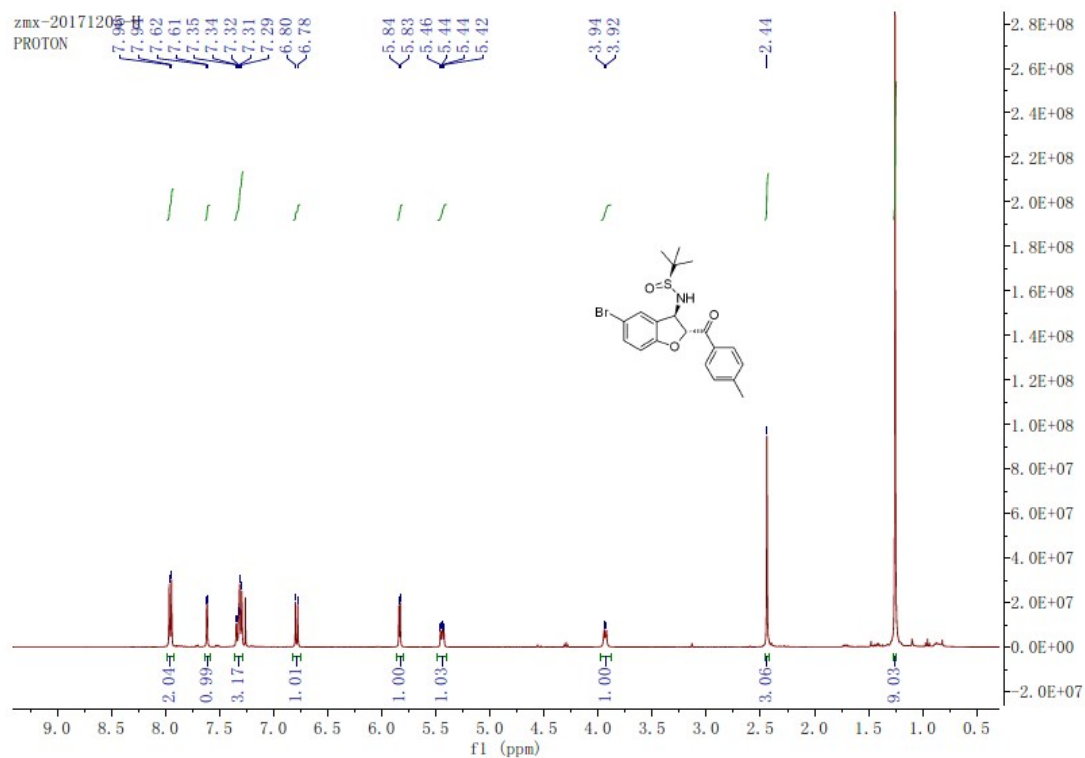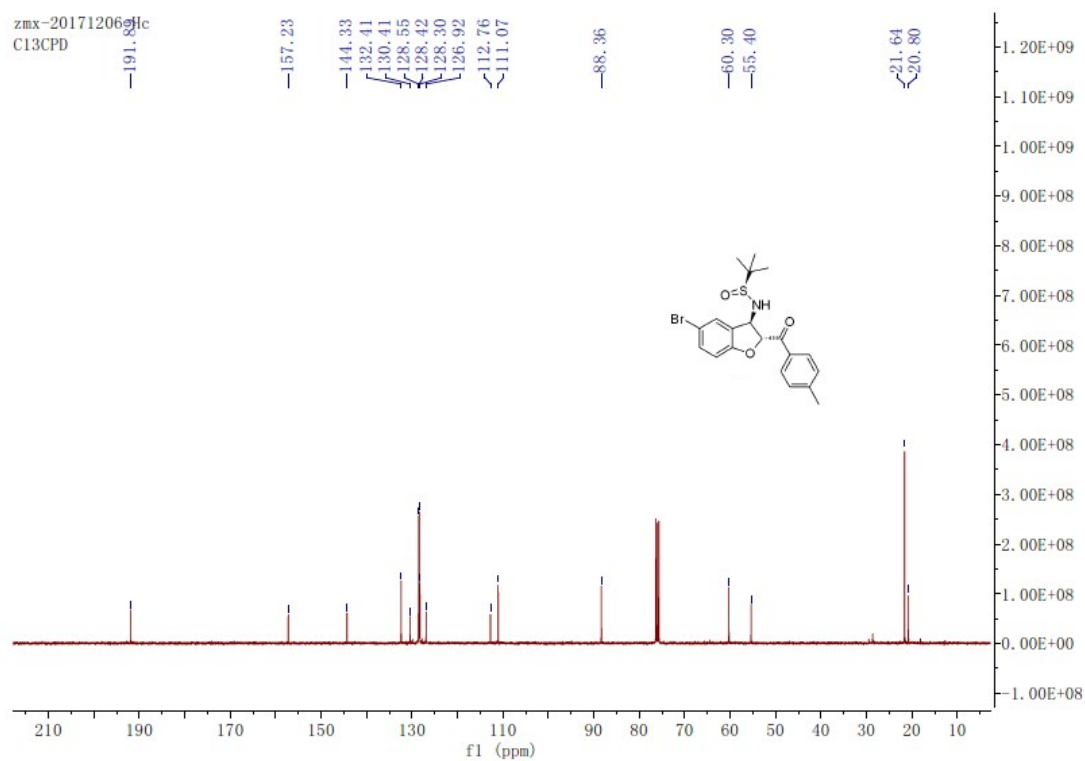

***Trans-(S)-N-((2R,3R)-5-Chloro-2-(4-methylbenzoyl)-2,3-dihydrobenzofuran-3-yl)-2-methylpropane-2-sulfinamide (3l)***

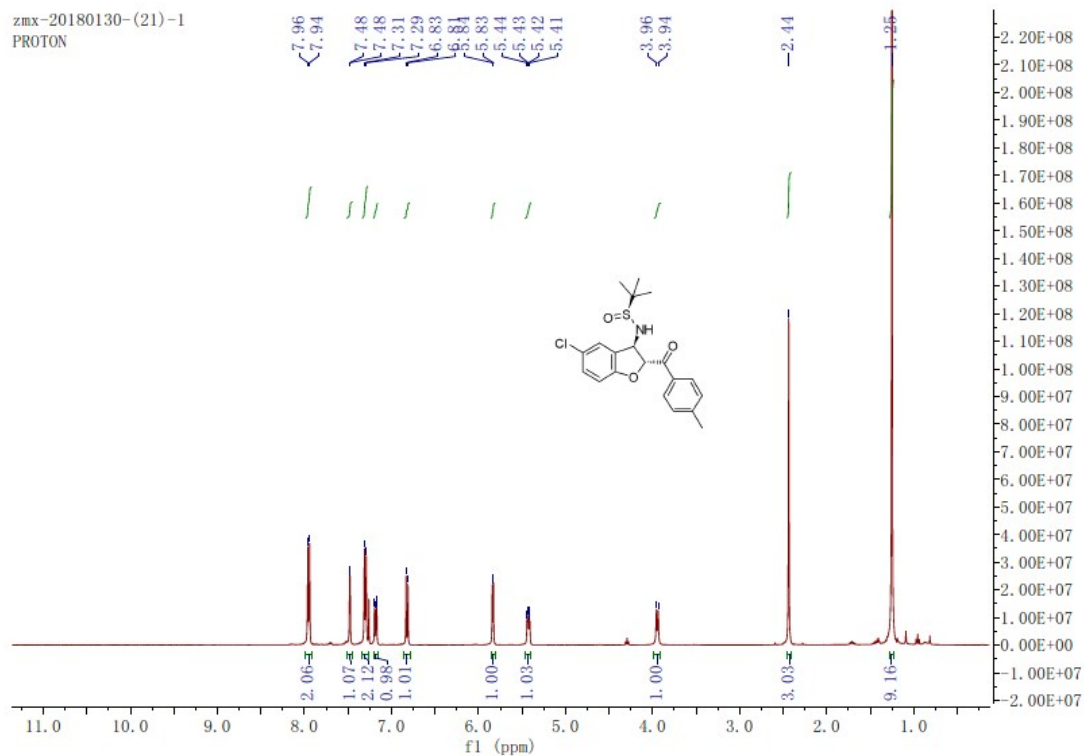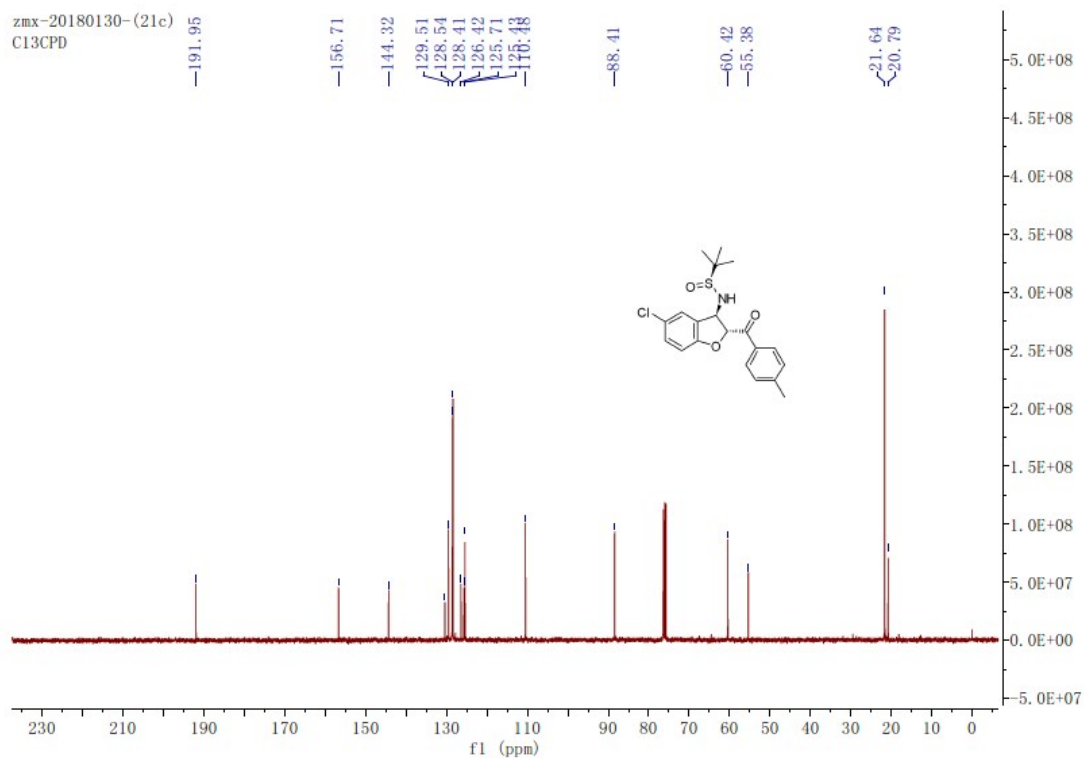

Copies of  $^1\text{H}$  NMR and  $^{13}\text{C}$  NMR spectra of *(R,S,2S,3S)*-*trans*-**3a-3n**:

*Trans*-*(R)*-*N*-*((2S,3S)*-2-Benzoyl-2,3-dihydrobenzofuran-3-yl)-2-methylpropane-2-sulfinamide

**(3a)**

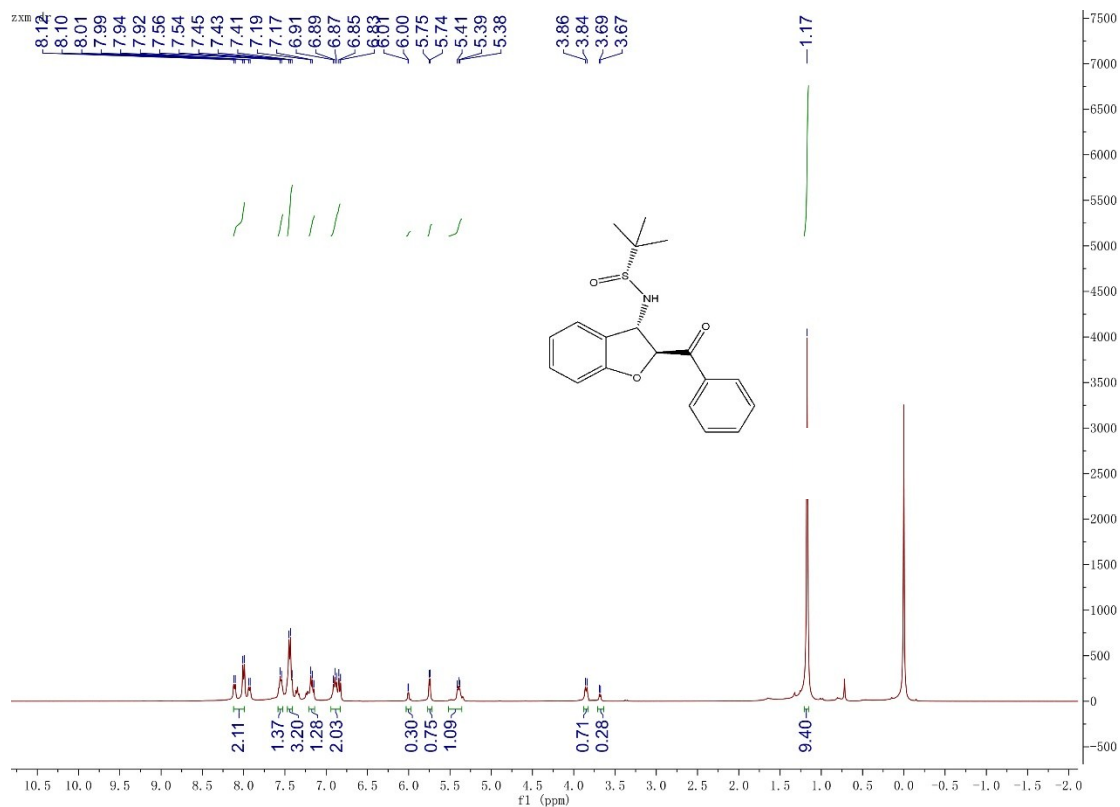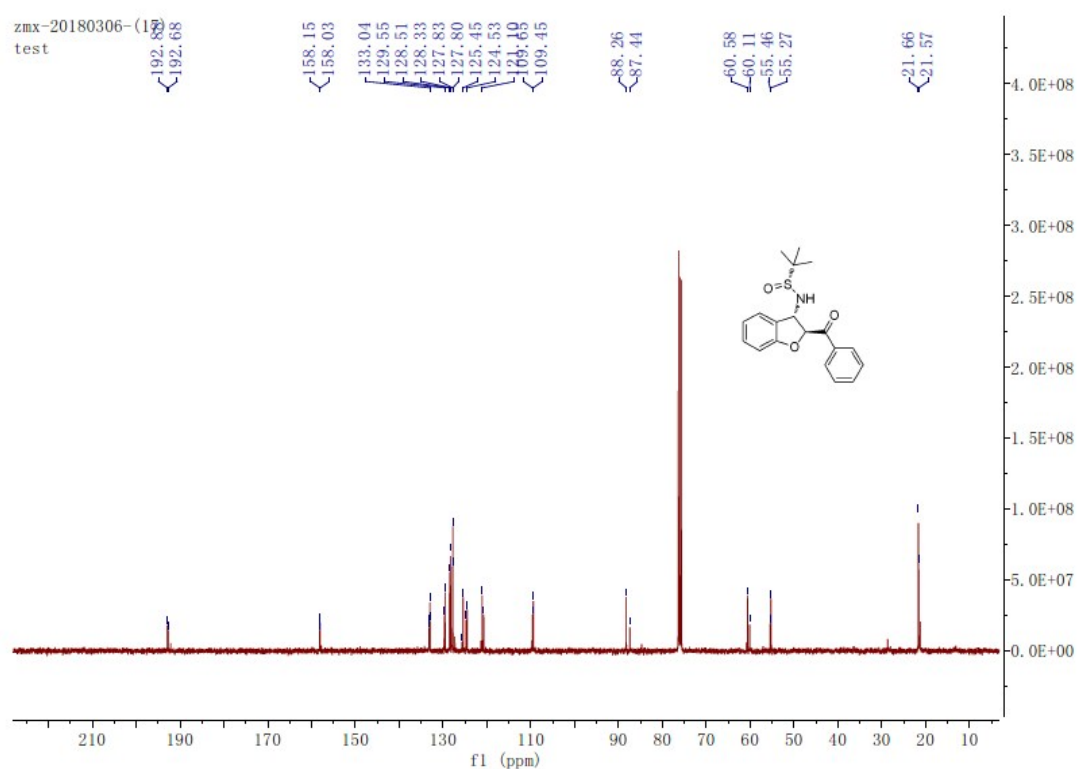

***Trans-(R)-N-((2S,3S)-2-Benzoyl-5-chloro-2,3-dihydrobenzofuran-3-yl)-2-methylpropane-2-sulfinamide (3b)***

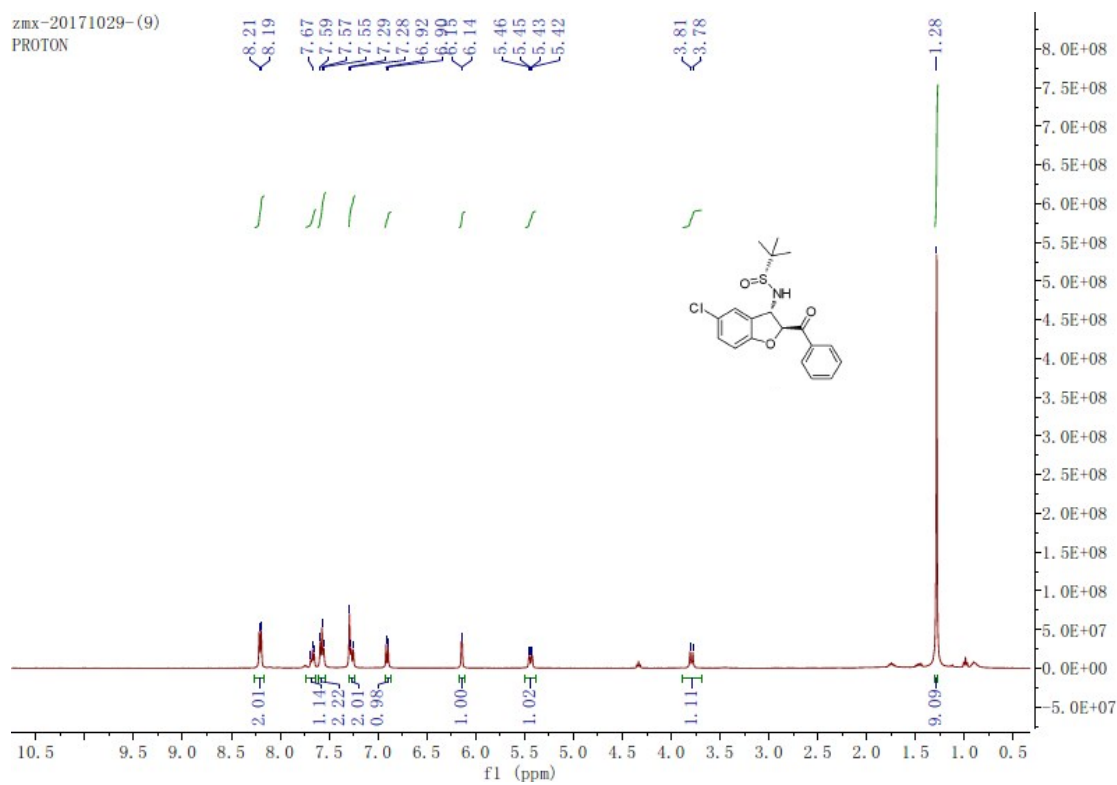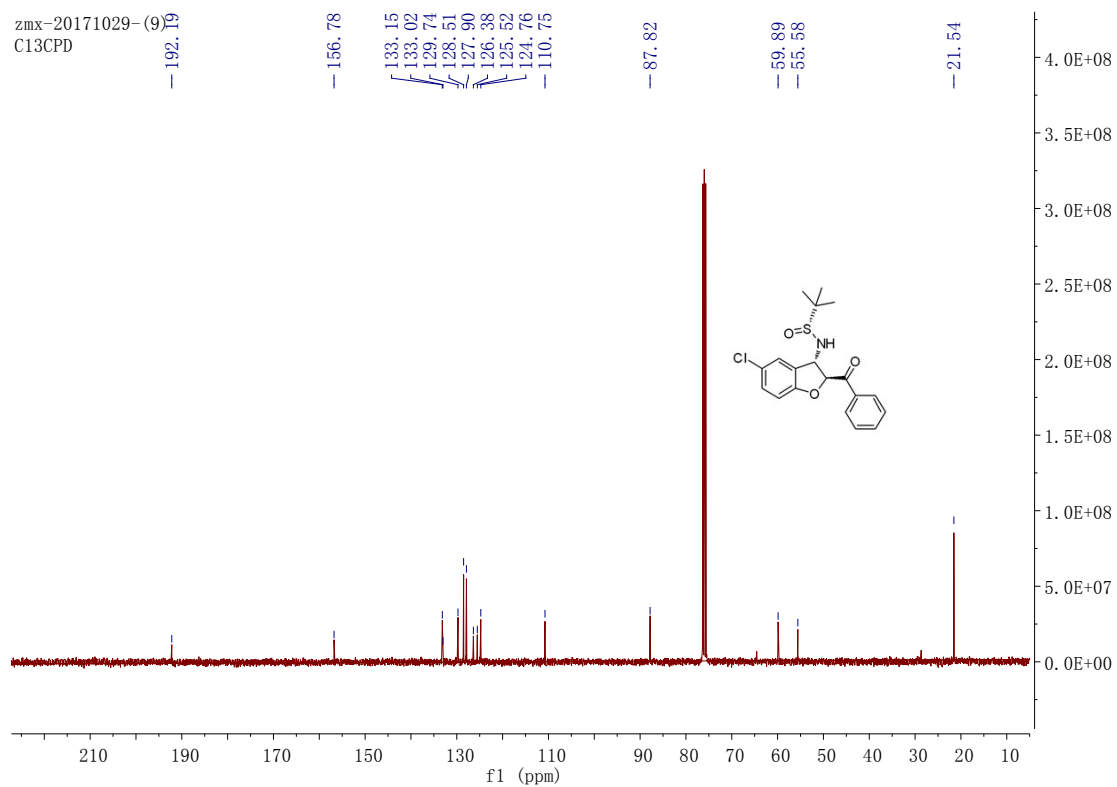

***Trans-(R)-N-((2S,3S)-2-Benzoyl-5-bromo-2,3-dihydrobenzofuran-3-yl)-2-methylpropane-2-sulfinamide (3c)***

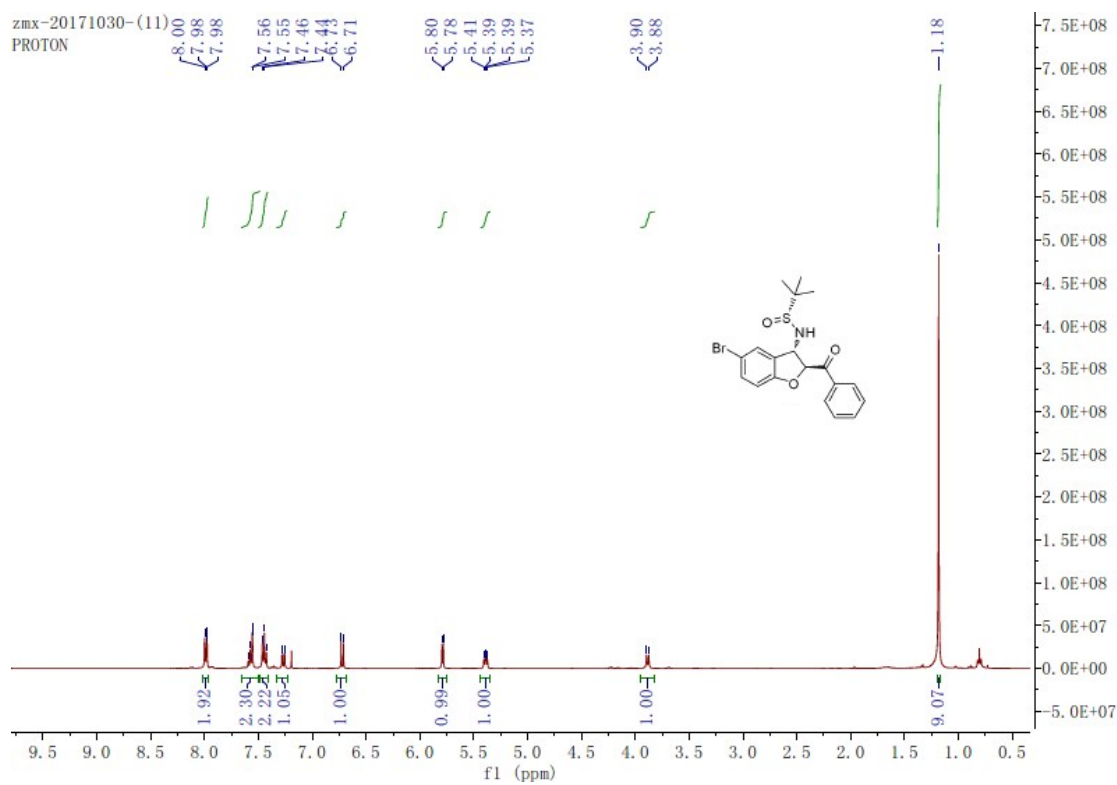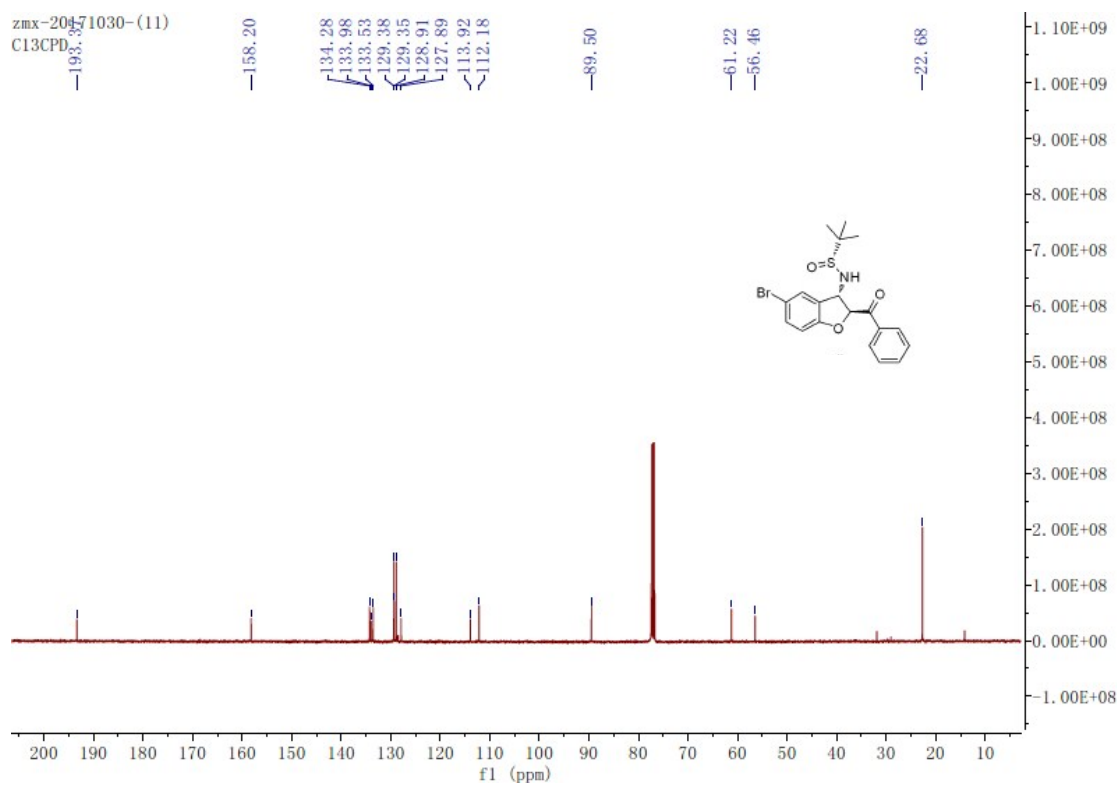



***Trans-(R)-N-((2S,3S)-2-Benzoyl-5,7-dichloro-2,3-dihydrobenzofuran-3-yl)-2-methylpropane-2-sulfinamide (3d)***

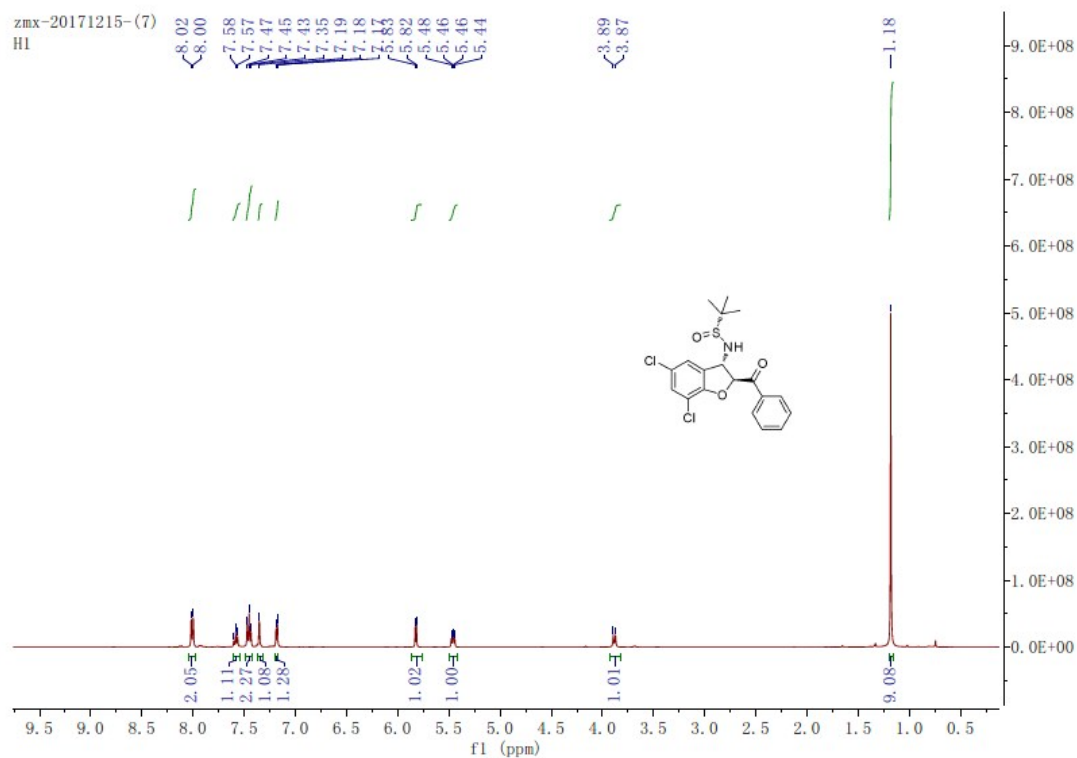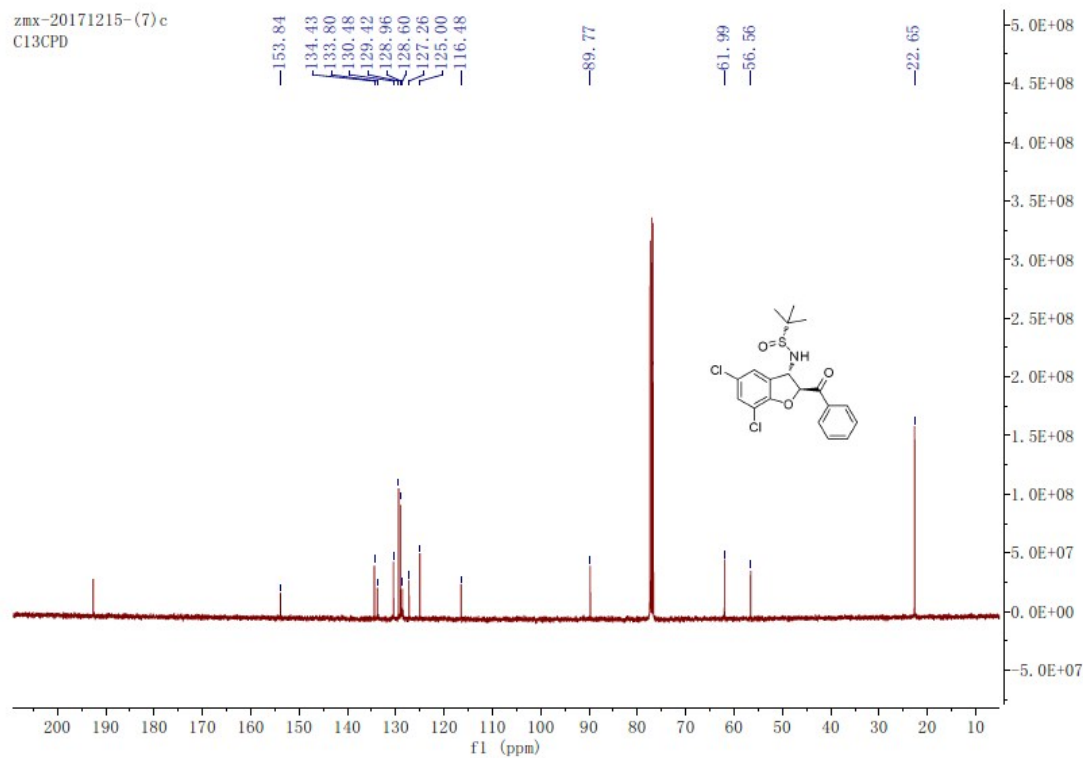

***Trans-(R)-N-((1S,2S)-2-benzoyl-1,2-dihydronaphtho[2,1-b]furan-1-yl)-2-methylpropane-2-sulfinamide (3e)***

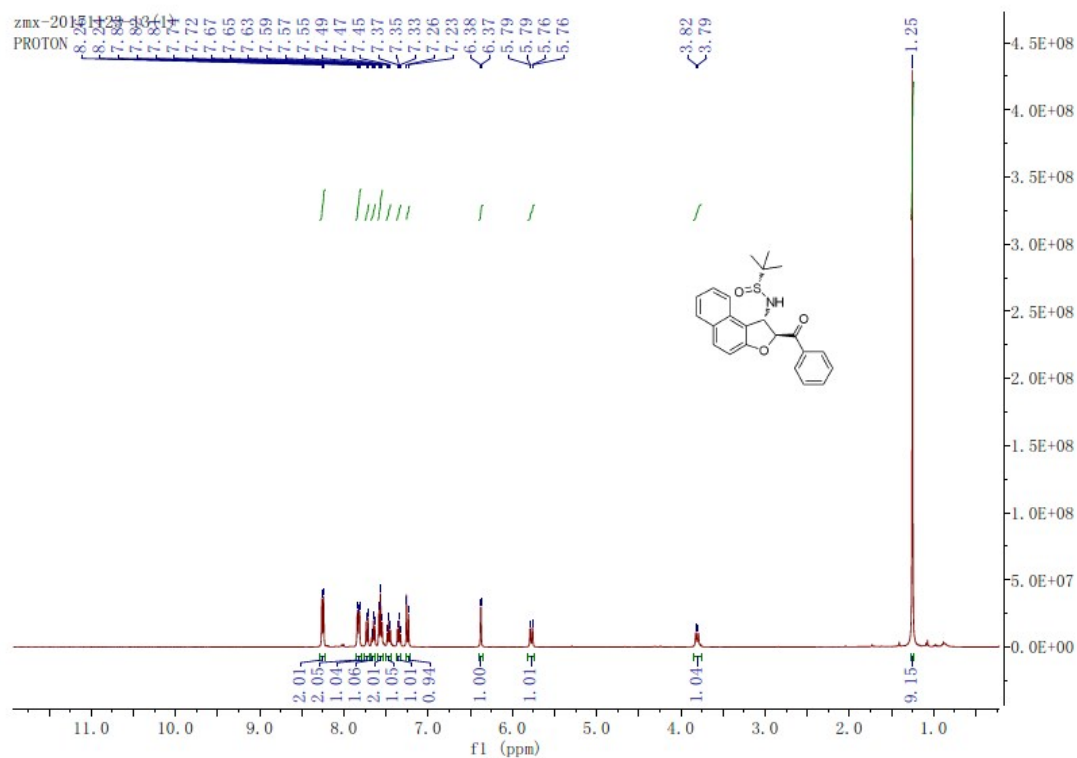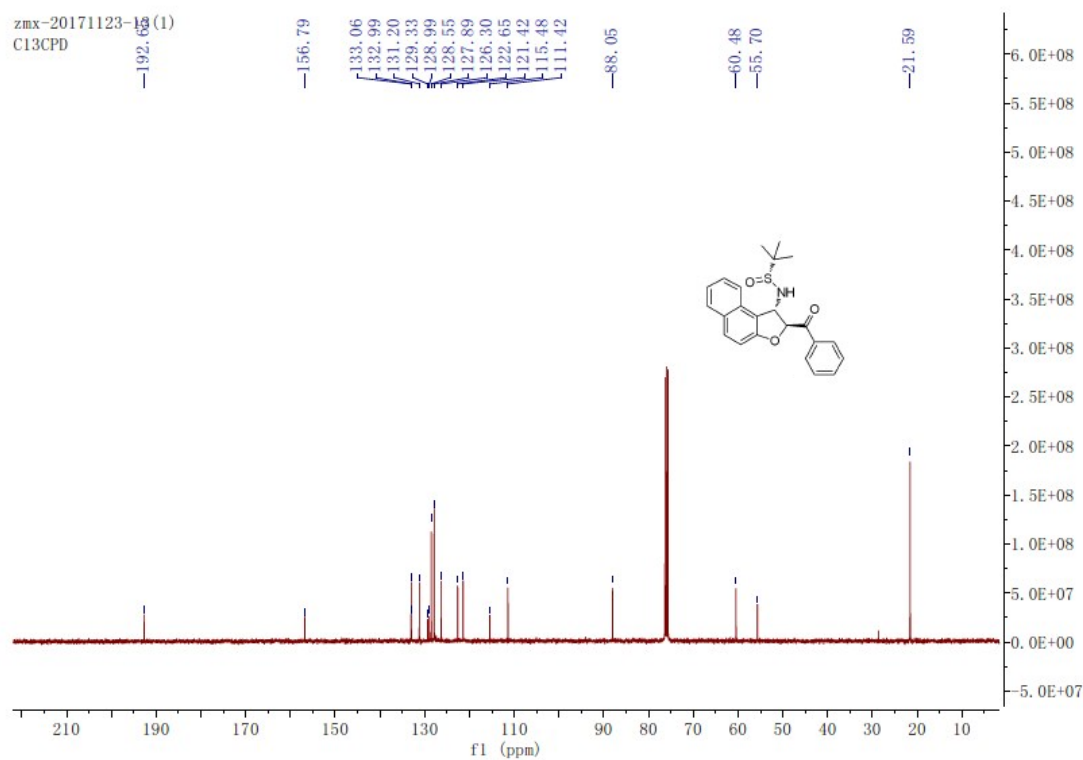

***Trans-(R)-N-((2S,3S)-5-chloro-2-(4-chlorobenzoyl)-2,3-dihydrobenzofuran-3-yl)-2-methylpropane-2-sulfinamide (3f)***

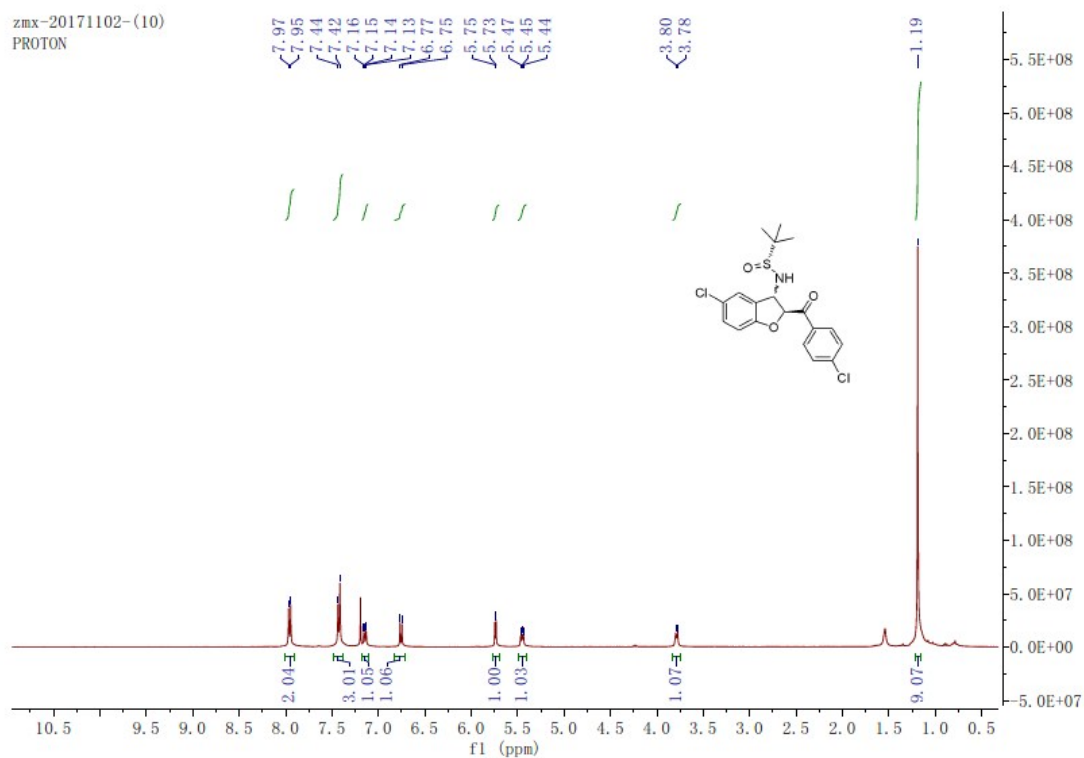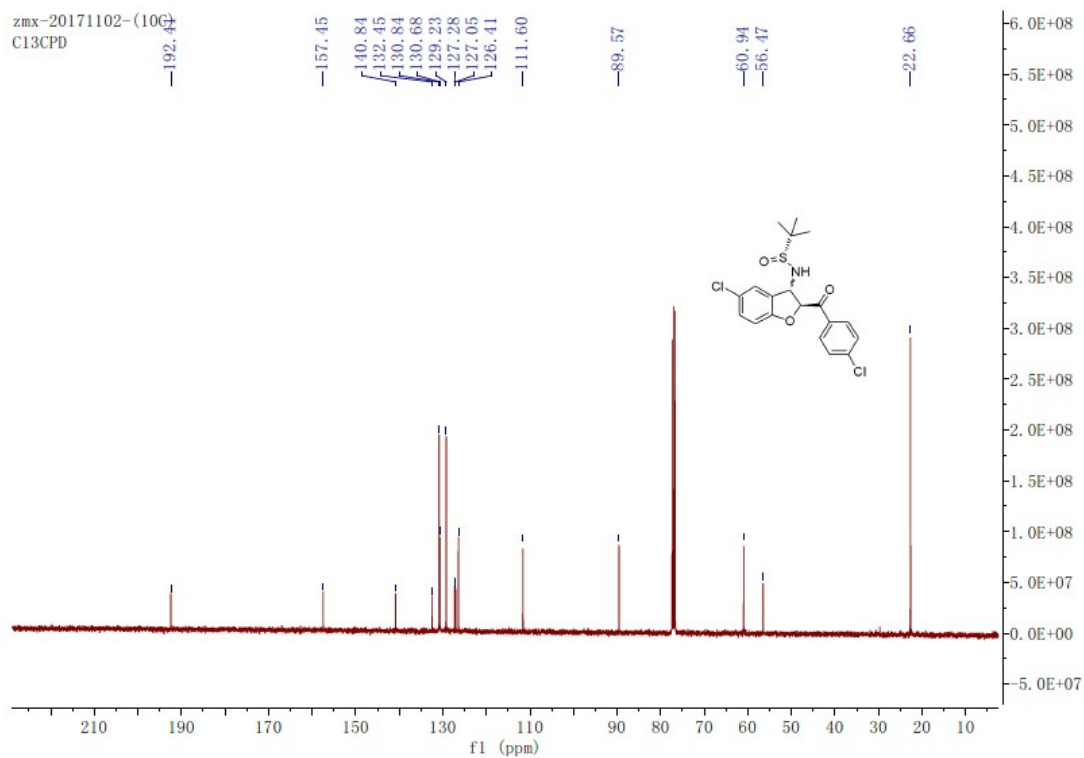

***Trans-(R)-N-((2S,3S)-5-Bromo-2-(4-chlorobenzoyl)-2,3-dihydrobenzofuran-3-yl)-2-methylpropane-2-sulfinamide (3g)***

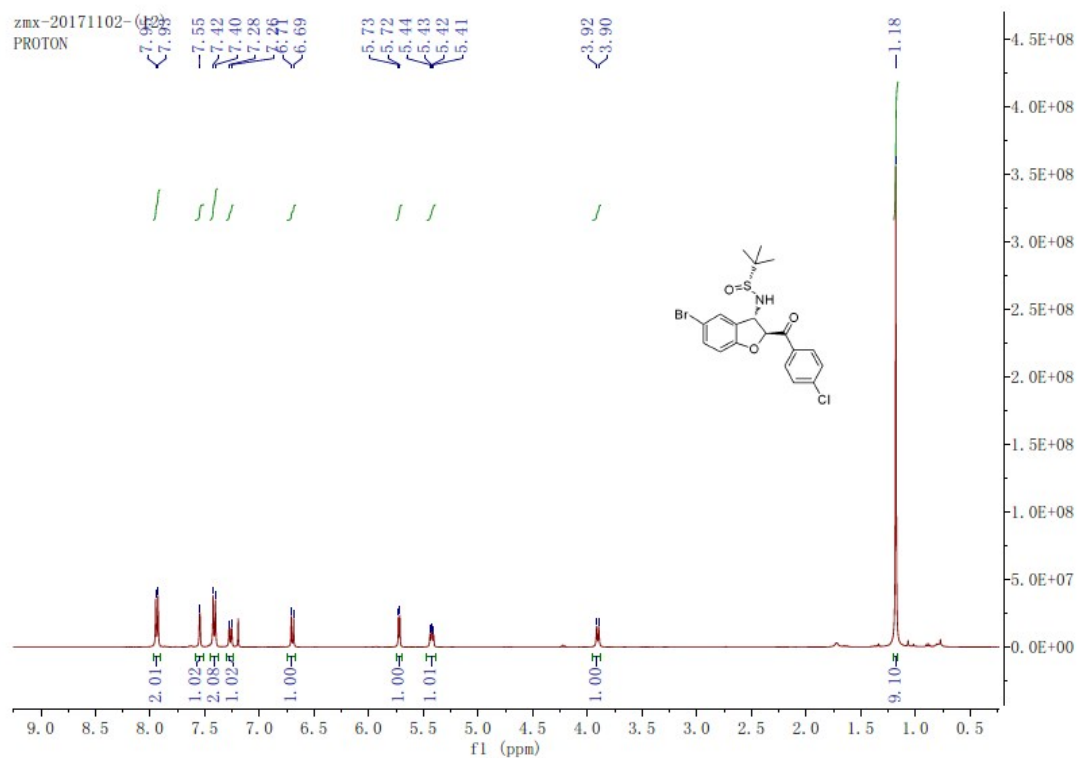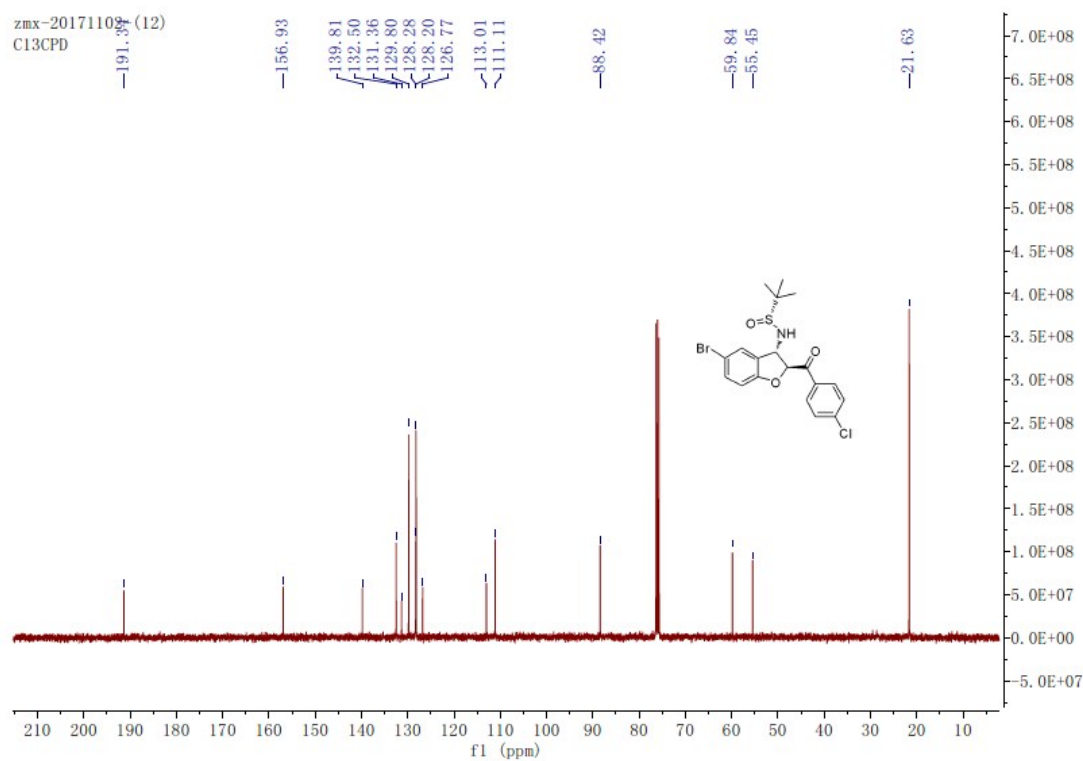

***Trans-(R)-N-((2S,3S)-5,7-Dichloro-2-(4-chlorobenzoyl)-2,3-dihydrobenzofuran-3-yl)-2-methylpropane-2-sulfinamide (3h)***

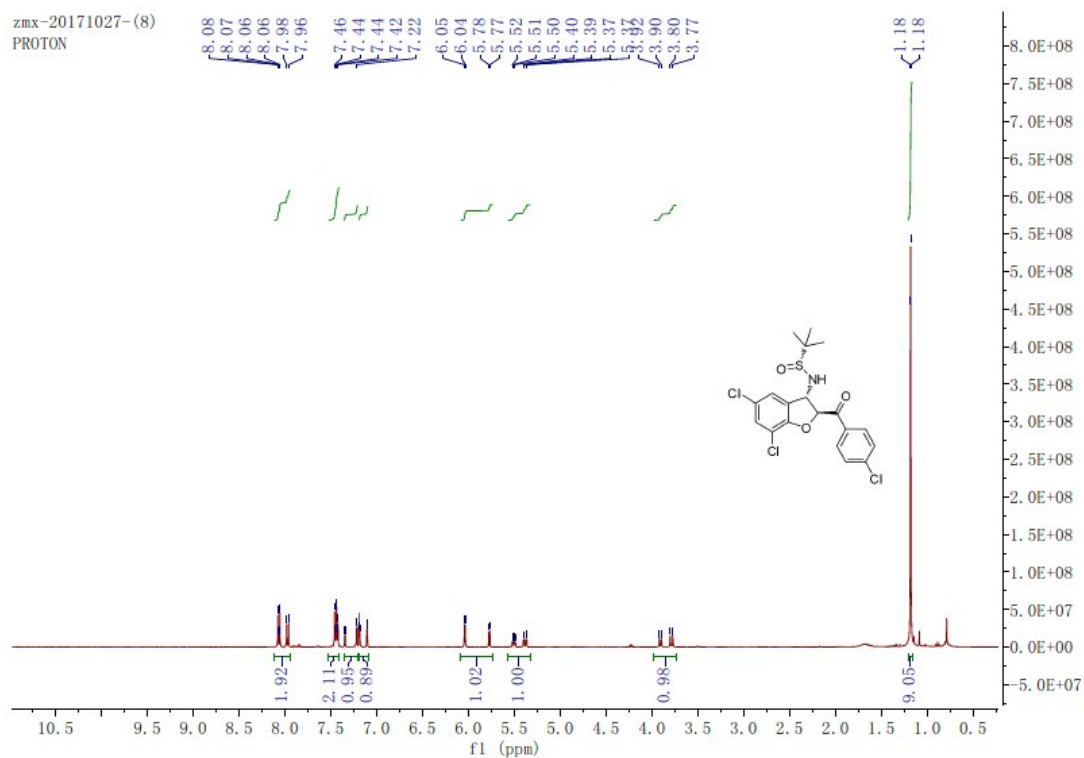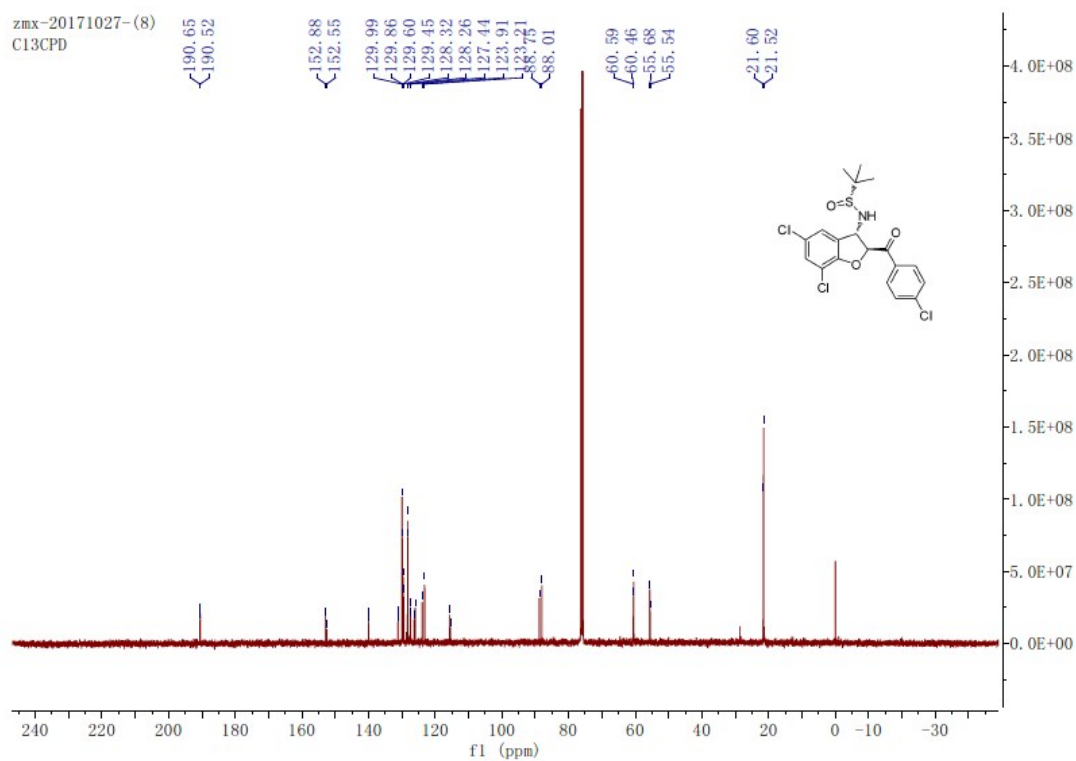

***Trans-(R)-N-((1S,2S)-2-(4-Chlorobenzoyl)-1,2-dihydronaphtho[2,1-b]furan-1-yl)-2-methylpropane-2-sulfinamide (3i)***

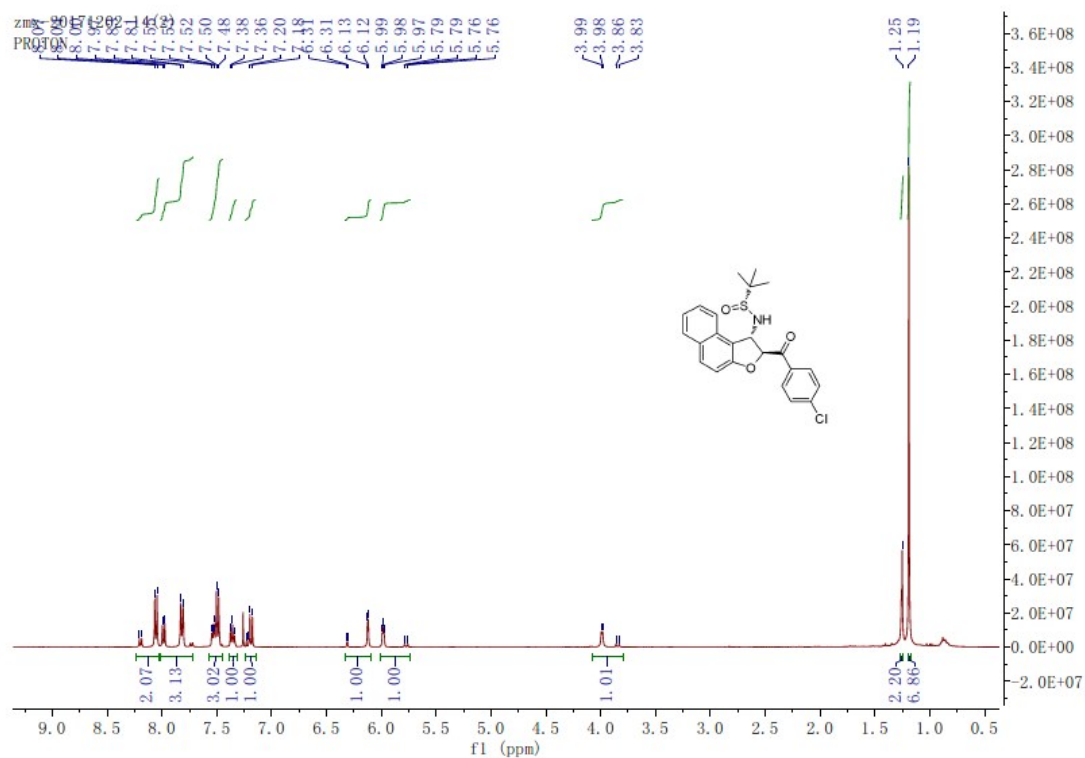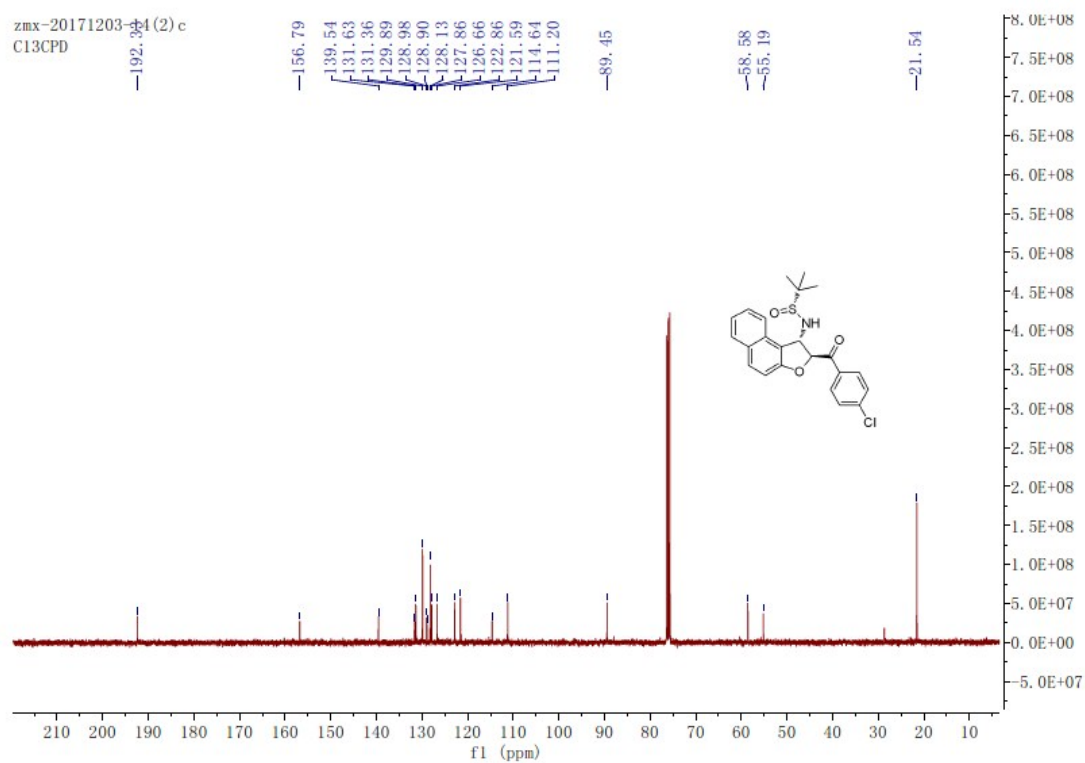

***Trans-(R)-2-Methyl-N-((1S,2S)-2-(4-methylbenzoyl)-1,2-dihydronaphtho[2,1-b]furan-1-yl)propane-2-sulfinamide (3j)***

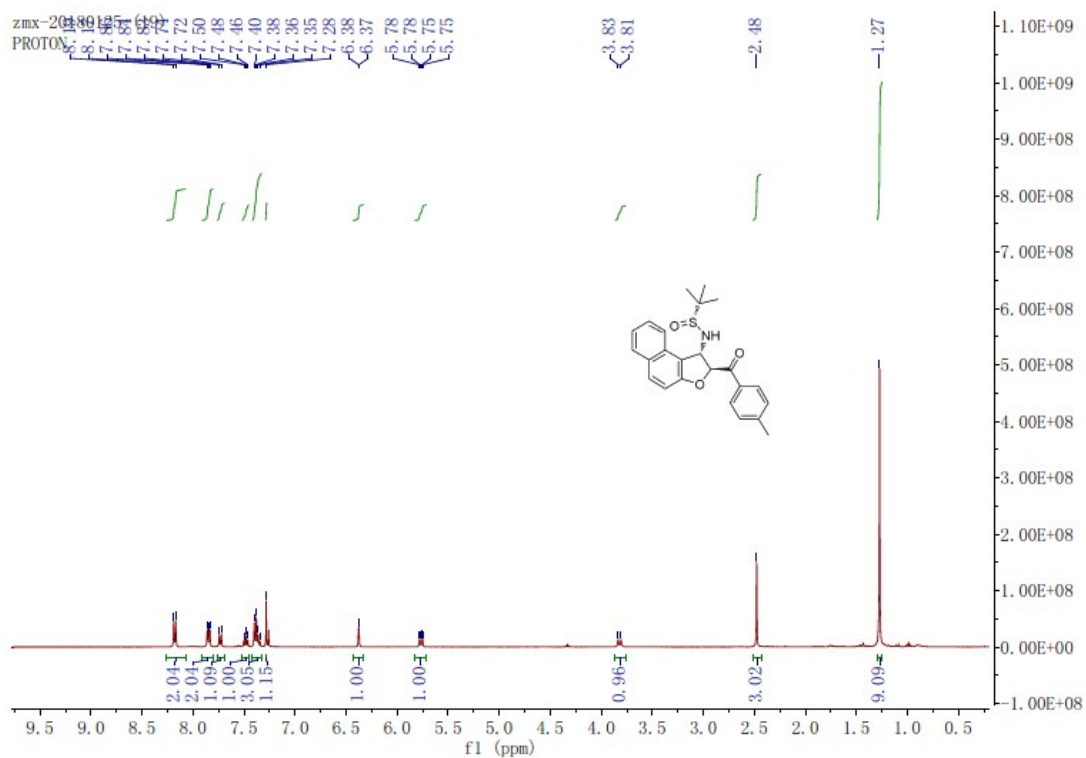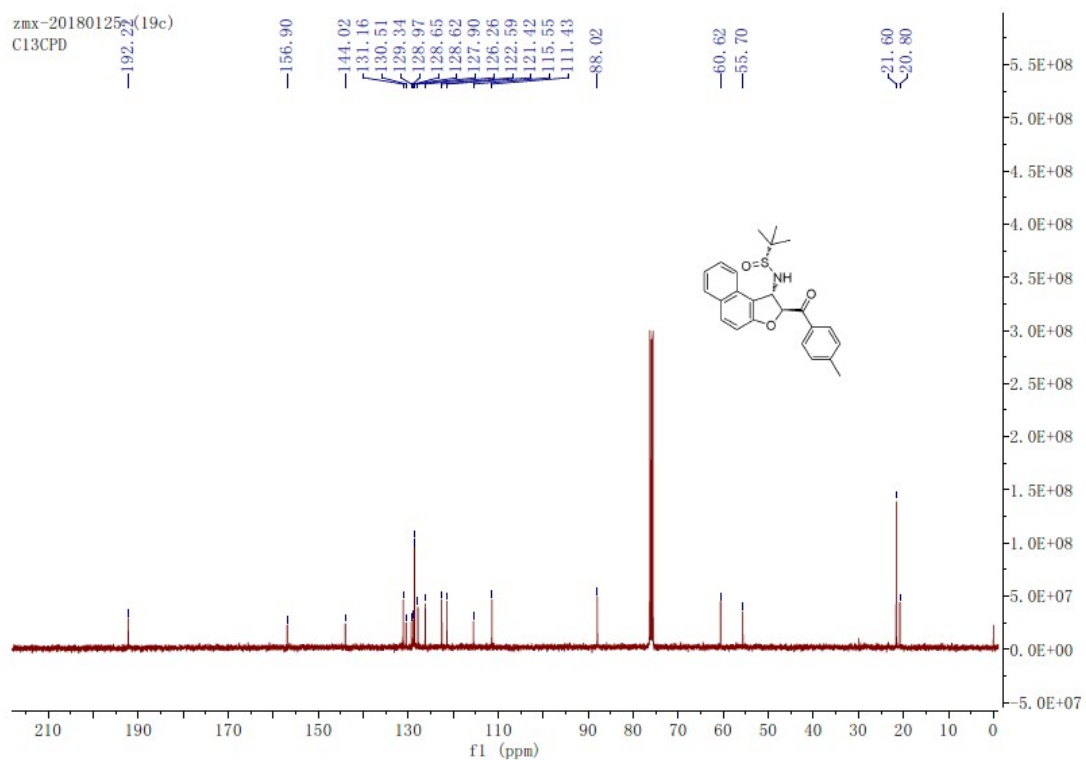



***Trans-(R)-N-((2S,3S)-5-Chloro-2-(4-methylbenzoyl)-2,3-dihydrobenzofuran-3-yl)-2-methylpropane-2-sulfinamide (3l)***

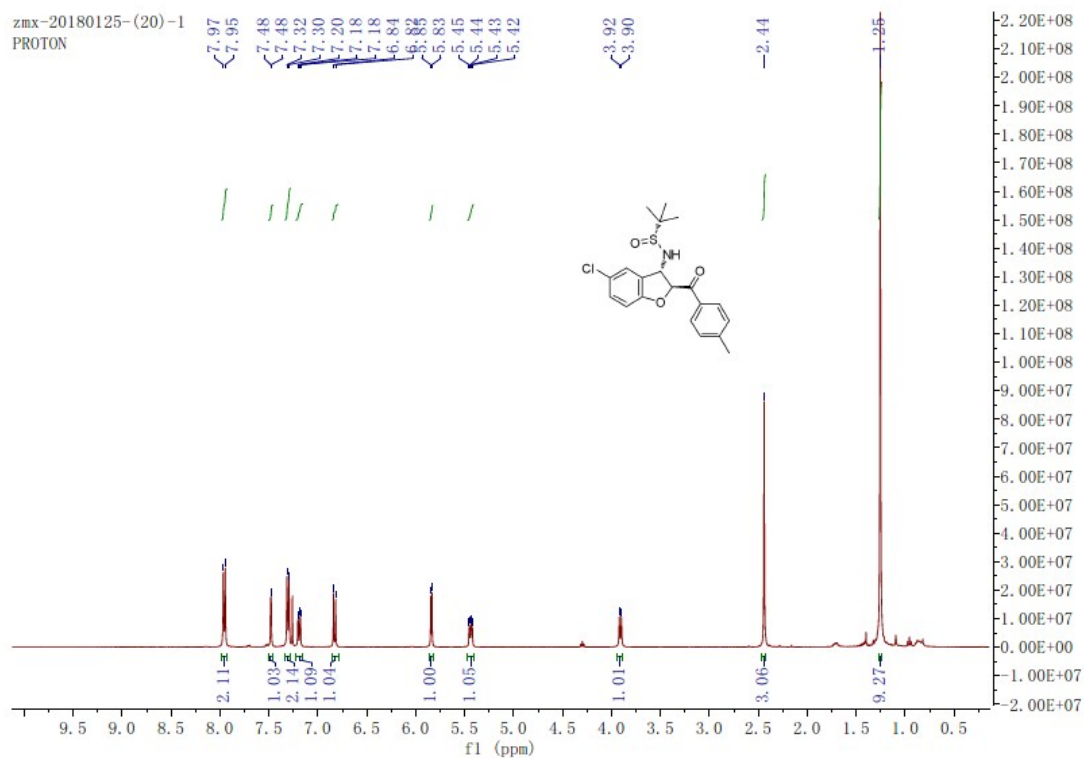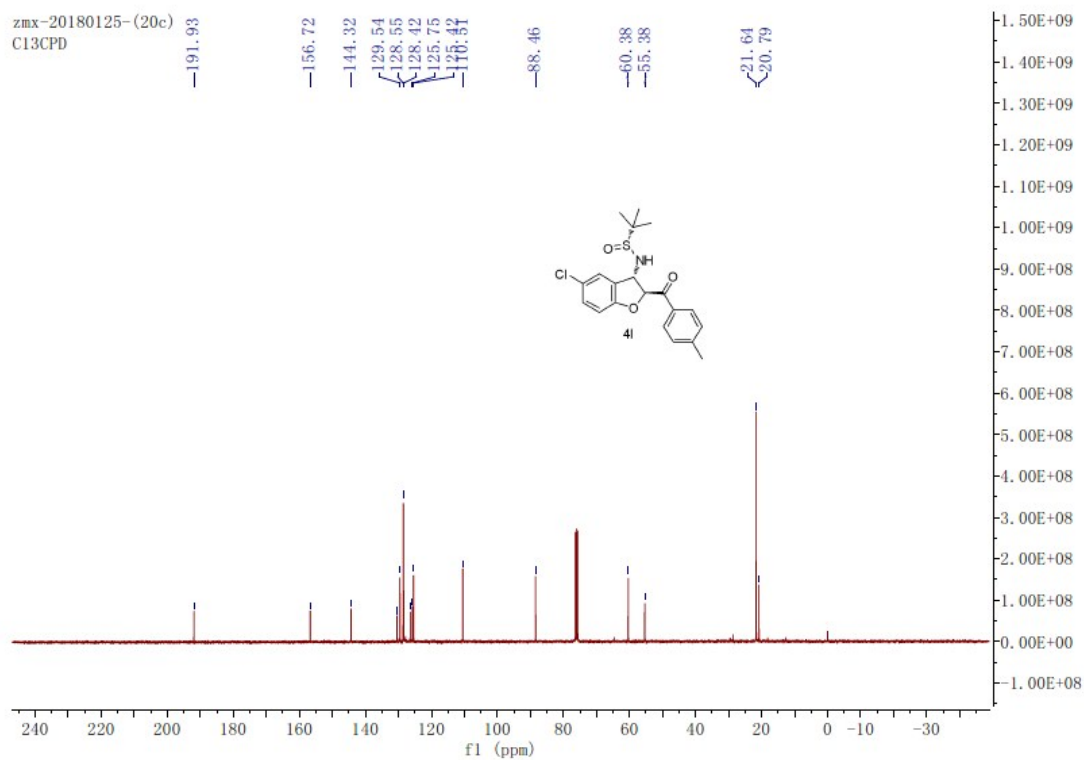



***Trans-(R)-N-((2S,3S)-5-Bromo-2-(4-methylbenzoyl)-2,3-dihydrobenzofuran-3-yl)-2-methylpropane-2-sulfinamide (3n)***

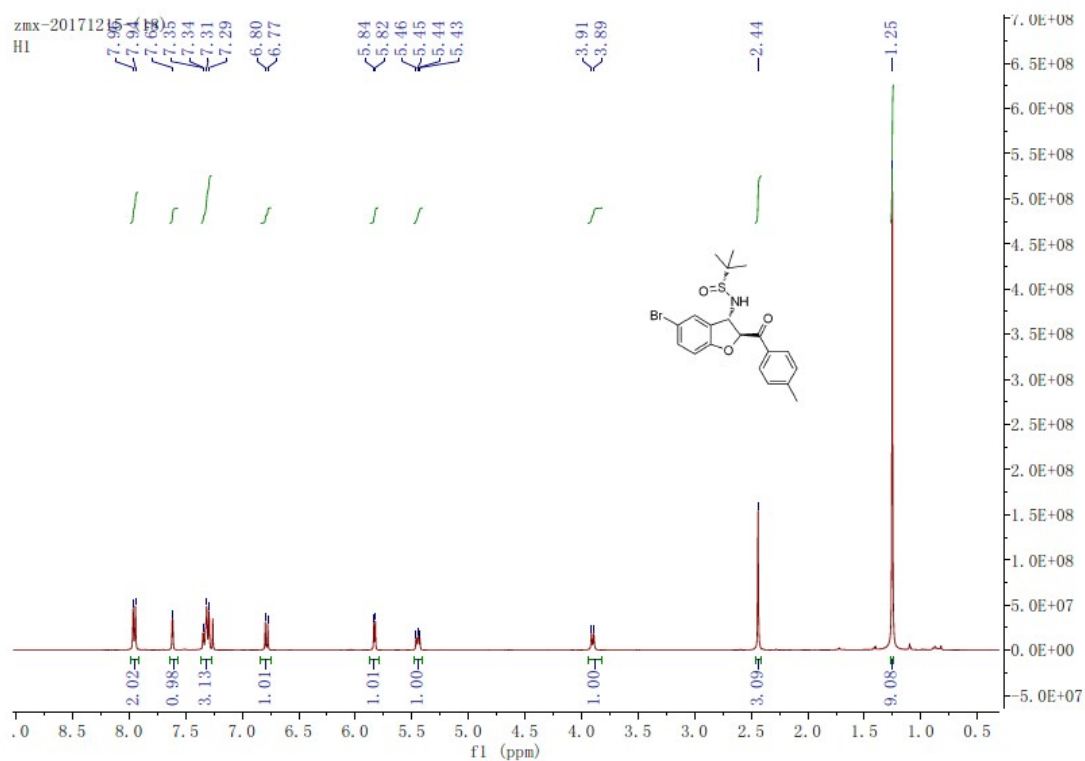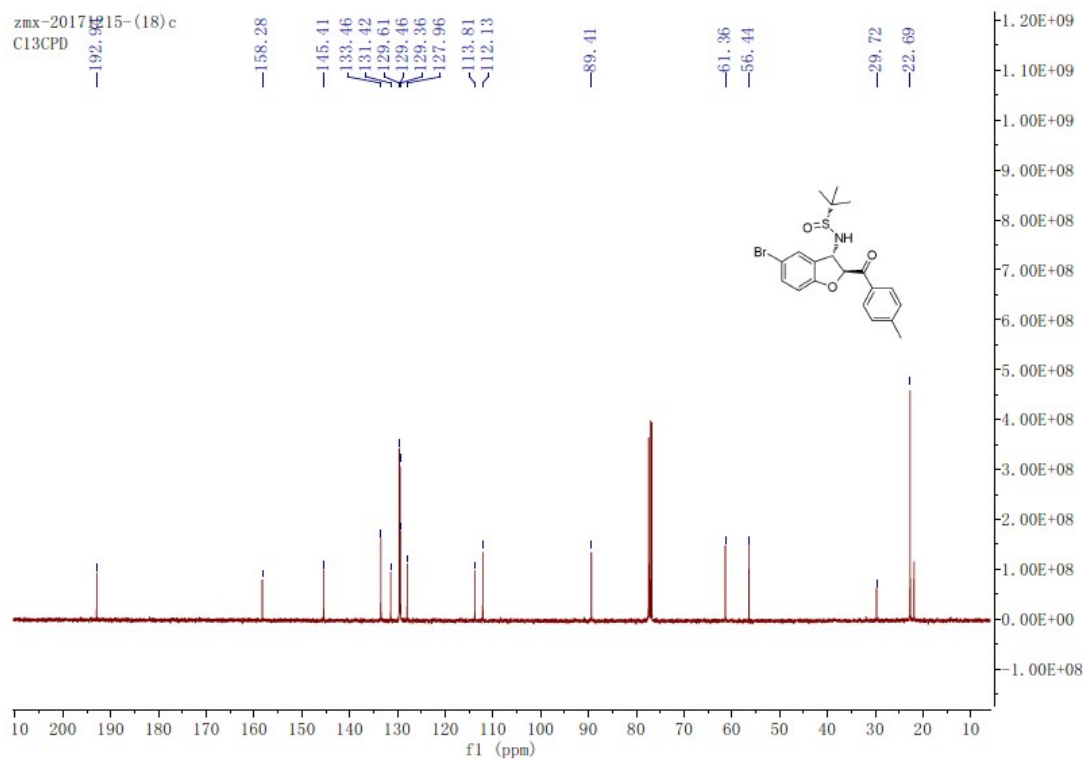

Copies of  $^1\text{H}$  NMR and  $^{13}\text{C}$  NMR spectra of *cis*-(*Ss*,*2R*,*3R*)-**3d**:

*Cis*-(*S*)-*N*-((*2S*,*3R*)-2-Benzoyl-5,7-dichloro-2,3-dihydrobenzofuran-3-yl)-2-methylpropane-2-sulfonamide (**3d**)

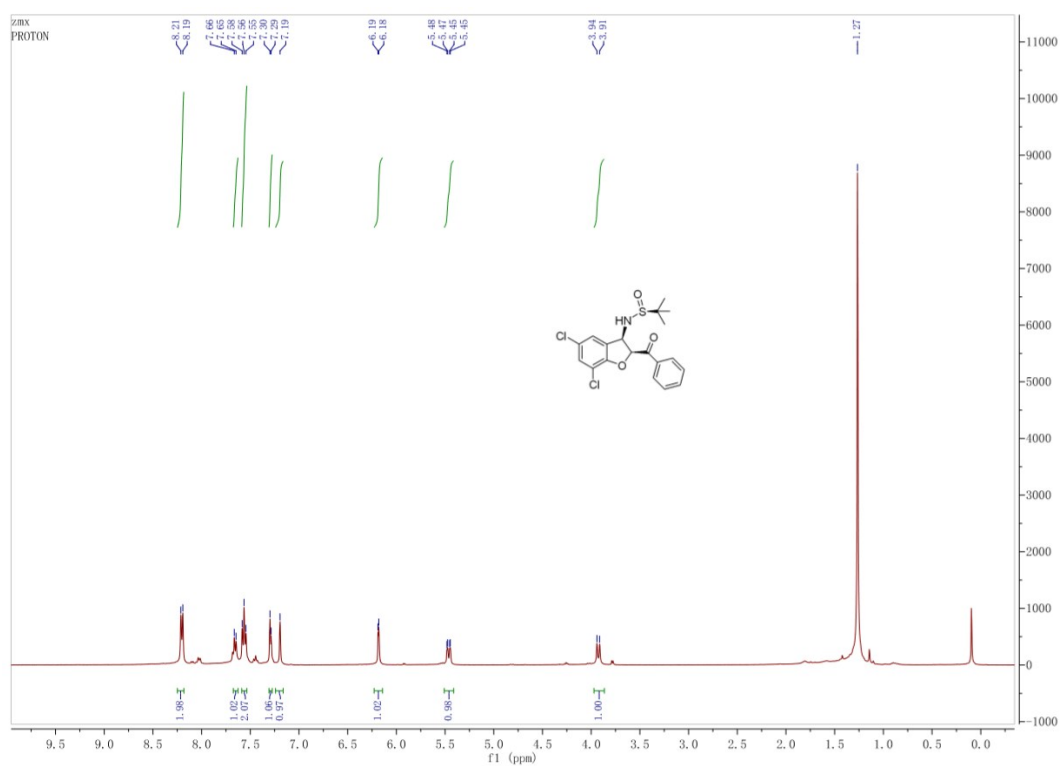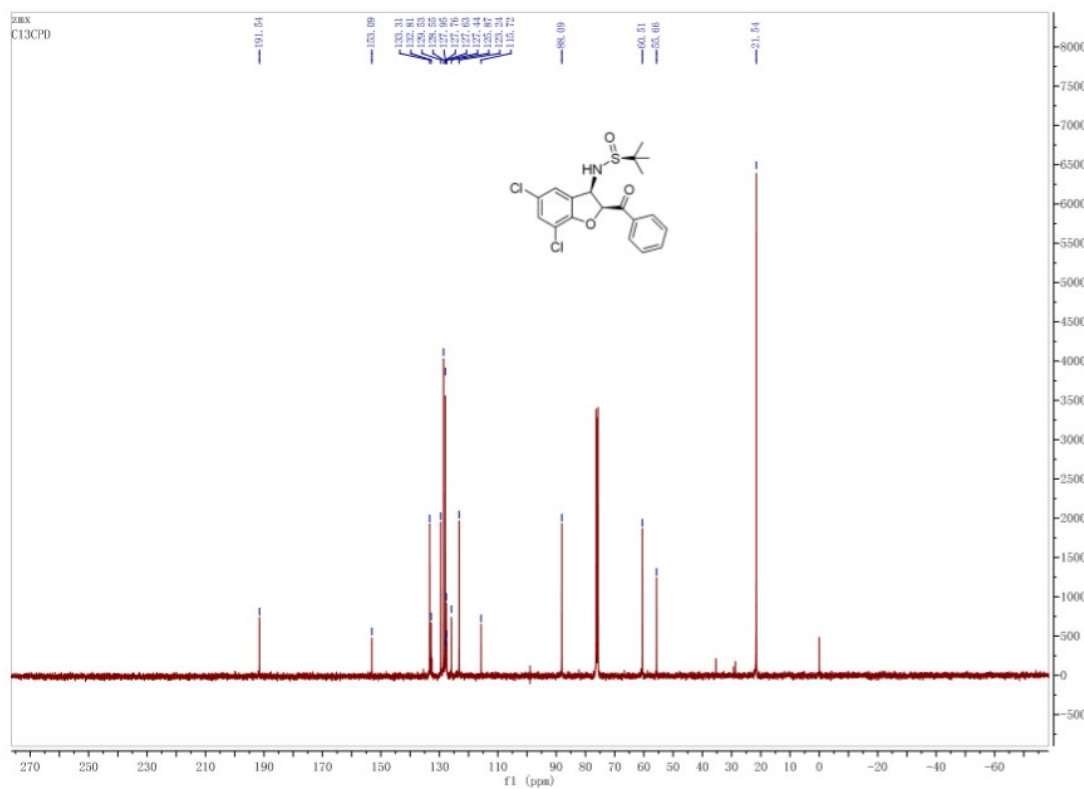

***((2R,3R)-3-amino-2,3-dihydrobenzofuran-2-yl)(phenyl)methanone hydrochloride (4a)***

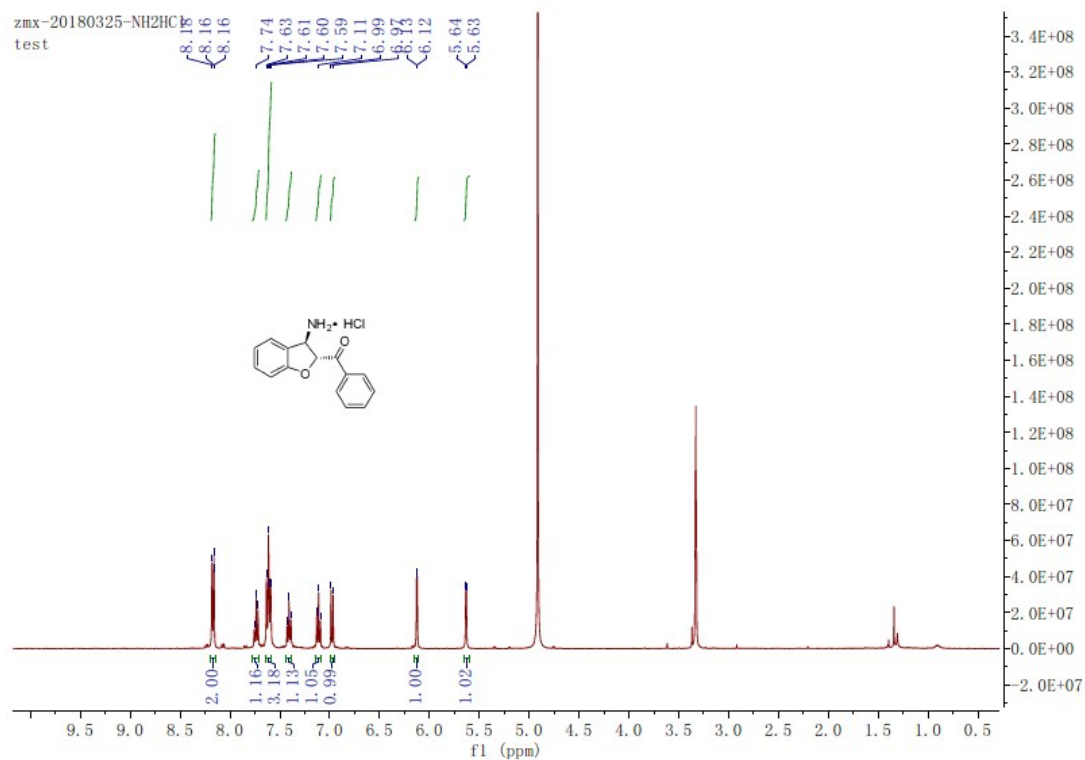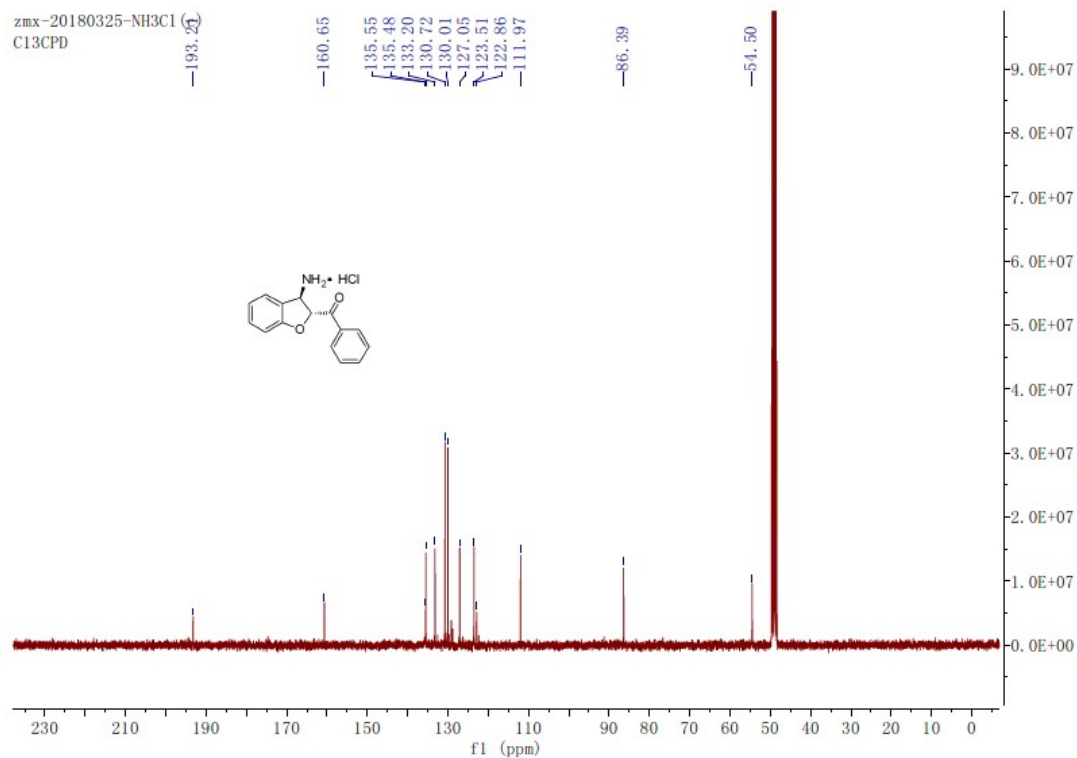

### X-ray crystallographic data of compound *trans*-(*Ss,2R,3R*)-**3a**

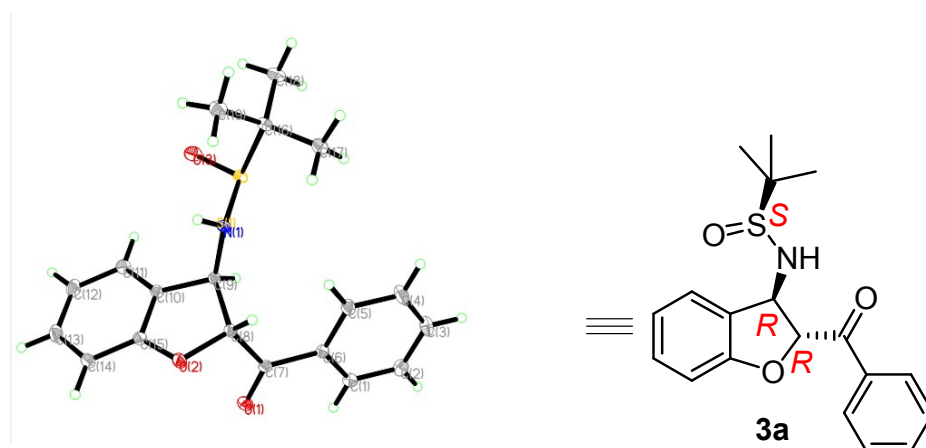

Figure S1 X-ray crystal structure of *trans*-**3a**

Displacement ellipsoids are shown at the 50% probability level.

Table S1 Crystal data and structure refinement for compound *trans*-**3a**

| Name                                  | Compound 193e                                     |
|---------------------------------------|---------------------------------------------------|
| Empirical formula                     | C <sub>19</sub> H <sub>21</sub> NO <sub>3</sub> S |
| Formula weight                        | 343.43                                            |
| Temperature/K                         | 133.15                                            |
| Crystal system                        | orthorhombic                                      |
| Space group                           | P2 <sub>1</sub> 2 <sub>1</sub> 2 <sub>1</sub>     |
| a/Å                                   | 9.1621(2)                                         |
| b/Å                                   | 11.5165(2)                                        |
| c/Å                                   | 17.1645(4)                                        |
| $\alpha$ /°                           | 90.00                                             |
| $\beta$ /°                            | 90.00                                             |
| $\gamma$ /°                           | 90.00                                             |
| Volume/Å <sup>3</sup>                 | 1811.10(7)                                        |
| Z                                     | 4                                                 |
| $\rho_{\text{calc}}$ /cm <sup>3</sup> | 1.260                                             |

|                                                |                                                               |
|------------------------------------------------|---------------------------------------------------------------|
| $\mu/\text{mm}^{-1}$                           | 0.195                                                         |
| F(000)                                         | 728.0                                                         |
| Crystal size/ $\text{mm}^3$                    | $0.2 \times 0.18 \times 0.12$                                 |
| Radiation                                      | MoK $\alpha$ ( $\lambda = 0.71073$ )                          |
| $2\theta$ range for data collection/ $^\circ$  | 4.26 to 61.8                                                  |
| Index ranges                                   | $-12 \leq h \leq 12, -15 \leq k \leq 15, -24 \leq l \leq 23$  |
| Reflections collected                          | 19767                                                         |
| Independent reflections                        | 5059 [ $R_{\text{int}} = 0.0240, R_{\text{sigma}} = 0.0238$ ] |
| Data/restraints/parameters                     | 5059/1/223                                                    |
| Goodness-of-fit on $F^2$                       | 1.047                                                         |
| Final R indexes [ $I \geq 2\sigma(I)$ ]        | $R_1 = 0.0281, wR_2 = 0.0701$                                 |
| Final R indexes [all data]                     | $R_1 = 0.0303, wR_2 = 0.0710$                                 |
| Largest diff. peak/hole / $e \text{ \AA}^{-3}$ | 0.21/-0.22                                                    |
| Flack parameter                                | -0.04(4)                                                      |

## X-ray crystallographic data of compound *trans*-(*R*,*2S*,*3S*)-3d

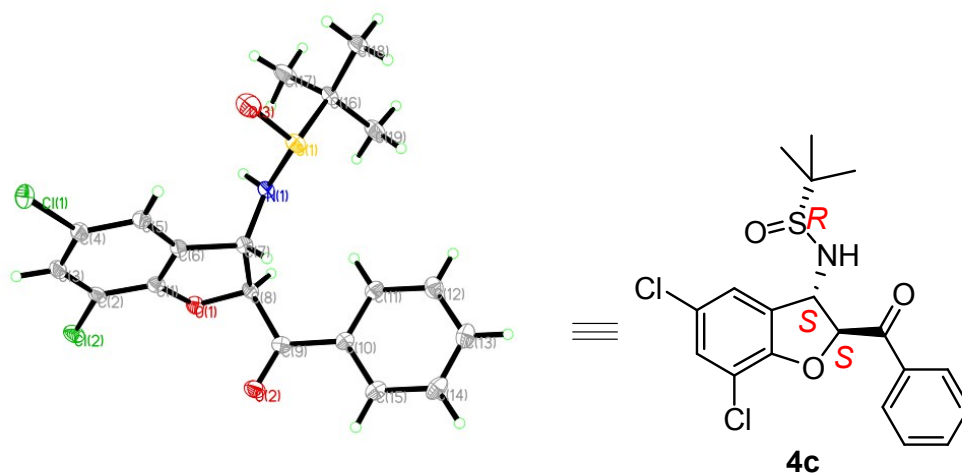

**Figure S2** X-ray crystal structure of *trans*-3d

Displacement ellipsoids are shown at the 50% probability level.

**Table S2** Crystal data and structure refinement for compound *trans*-3d

| Name                  | Compound 193c                                                     |
|-----------------------|-------------------------------------------------------------------|
| Empirical formula     | C <sub>19</sub> H <sub>19</sub> Cl <sub>2</sub> NO <sub>3</sub> S |
| Formula weight        | 412.31                                                            |
| Temperature/K         | 133.15                                                            |
| Crystal system        | orthorhombic                                                      |
| Space group           | P2 <sub>1</sub> 2 <sub>1</sub> 2 <sub>1</sub>                     |
| a/Å                   | 8.4226(17)                                                        |
| b/Å                   | 14.002(3)                                                         |
| c/Å                   | 16.760(3)                                                         |
| $\alpha$ /°           | 90.00                                                             |
| $\beta$ /°            | 90.00                                                             |
| $\gamma$ /°           | 90.00                                                             |
| Volume/Å <sup>3</sup> | 1976.6(7)                                                         |

|                                                |                                                               |
|------------------------------------------------|---------------------------------------------------------------|
| Z                                              | 4                                                             |
| $\rho_{\text{calc}}/\text{cm}^3$               | 1.386                                                         |
| $\mu/\text{mm}^{-1}$                           | 0.452                                                         |
| F(000)                                         | 856.0                                                         |
| Crystal size/ $\text{mm}^3$                    | $0.2 \times 0.18 \times 0.12$                                 |
| Radiation                                      | MoK $\alpha$ ( $\lambda = 0.71073$ )                          |
| 2 $\Theta$ range for data collection/ $^\circ$ | 4.86 to 55.688                                                |
| Index ranges                                   | $-10 \leq h \leq 11, -18 \leq k \leq 18, -22 \leq l \leq 22$  |
| Reflections collected                          | 19834                                                         |
| Independent reflections                        | 4700 [ $R_{\text{int}} = 0.0510, R_{\text{sigma}} = 0.0460$ ] |
| Data/restraints/parameters                     | 4700/1/243                                                    |
| Goodness-of-fit on $F^2$                       | 0.993                                                         |
| Final R indexes [ $I \geq 2\sigma(I)$ ]        | $R_1 = 0.0382, wR_2 = 0.0769$                                 |
| Final R indexes [all data]                     | $R_1 = 0.0451, wR_2 = 0.0808$                                 |
| Largest diff. peak/hole / $e \text{ \AA}^{-3}$ | 0.33/-0.23                                                    |
| Flack parameter                                | -0.09(3)                                                      |
